# Supplementary material for: Nickel-catalyzed reductive arylalkylation of alkenes: 5-exo cyclization vs. 6-endo cyclization vs. 1,2-aryl migration to 6-endo product
Source: Royal Society of Chemistry journal article supplement (doi:10.1039/d5dt00094g), 2025-01-01
Supplement: d5dt00094g1.pdf [file d5dt00094g1.pdf]

## *Supporting Information*

### **Nickel-Catalyzed Reductive Arylalkylation of Alkenes: 5-Exo Cyclization vs. 6-Endo Cyclization vs. 1,2-Aryl Migration to 6-Endo Product**

Yuxin Du,<sup>a</sup> Hongli Wu,<sup>a</sup> Miao Yang,<sup>b</sup> Yuanbin She,<sup>\*a</sup> and Yun-Fang Yang<sup>\*a</sup>

<sup>a</sup>College of Chemical Engineering, State Key Laboratory Breeding Base of Green-Chemical Synthesis Technology, Zhejiang University of Technology, Hangzhou, Zhejiang 310014, China.

<sup>b</sup>Chemical and Life Science Innovation Center, Department of Environment and Life Health, Anhui Vocational and Technical College, Hefei, Anhui 230011 China.

\*E-mail: sheyb@zjut.edu.cn

\*E-mail: yangyf@zjut.edu.cn

### **Table of Contents**

|                                                                                                                       |    |
|-----------------------------------------------------------------------------------------------------------------------|----|
| 1. DFT-computed Gibbs free energy barriers for oxidative addition step from ArNi <sup>II</sup> LBr species .....      | S2 |
| 2. Compare the stability of INT2 and TS2 with different multiplicities... ..                                          | S2 |
| 3. Transition states of bromine atom abstraction ( <sup>2</sup> TS6) and oxidative addition ( <sup>2</sup> TS7) ..... | S3 |
| 4. Study of the proposed mechanism for the reduction of Ni(II) to Ni(I).....                                          | S3 |
| 5. Transition states of 5-exo and 6-endo alkene insertions mediated by Ni(II) and Ni(III) species. ....               | S4 |
| 6. Geometrical structures and Gibbs free energy barriers of key transition states. ....                               | S5 |
| 7. DFT-computed thermodynamics of Ni <sup>III</sup> -alkyl species .....                                              | S5 |
| 8. Transition states of HBr departure ( <sup>2</sup> TS17), and hydrogen atom transfer ( <sup>2</sup> TS18).S6        |    |
| 9. Energies and free energies of calculated structures .....                                                          | S7 |
| 10. Cartesian coordinates of the structures .....                                                                     | S9 |

**1. DFT-computed Gibbs free energy barriers for oxidative addition step from  $\text{ArNi}^{\text{II}}\text{LBr}$  species.**

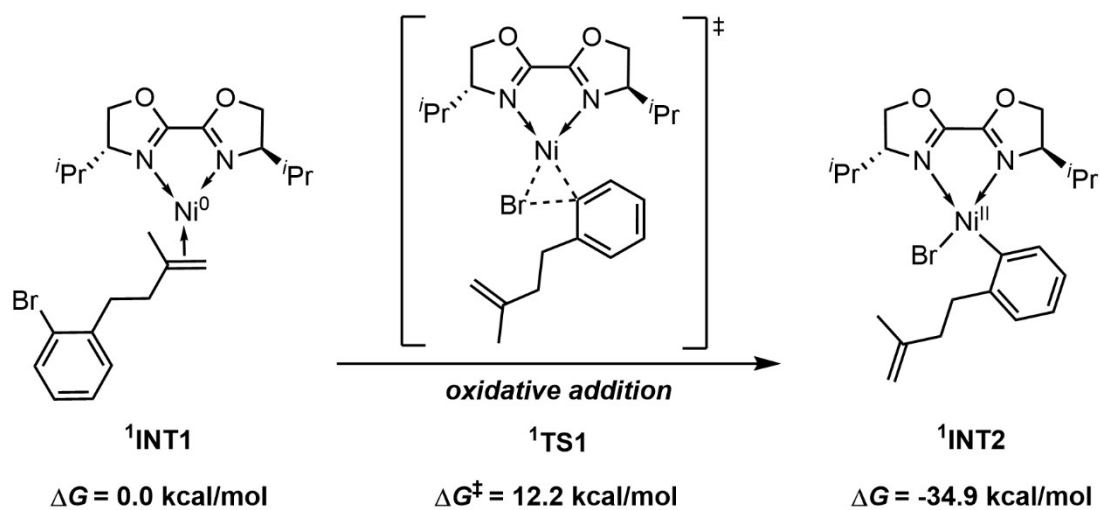

Figure S1. DFT-computed Gibbs free energy barriers for oxidative addition step from  $\text{ArNi}^{\text{II}}\text{LBr}$  intermediate.

**2. Compare the stability of INT2 and TS2 with different multiplicities.**

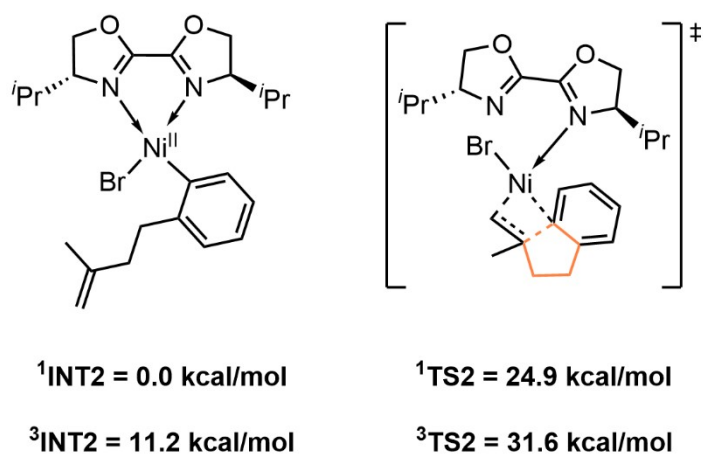

Figure S2. Compare the stability of INT2 and TS2 with different multiplicities.

**3. Transition states of bromine atom abstraction (<sup>2</sup>TS6) and oxidative addition (<sup>2</sup>TS7).**

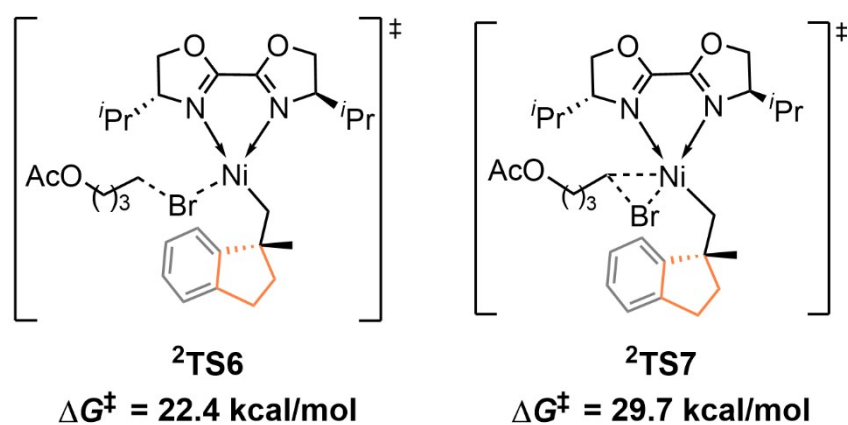

Figure S3. Transition states of bromine atom abstraction (<sup>2</sup>TS6) and oxidative addition (<sup>2</sup>TS7).

**4. Study of the proposed mechanism for the reduction of Ni(II) to Ni(I).**

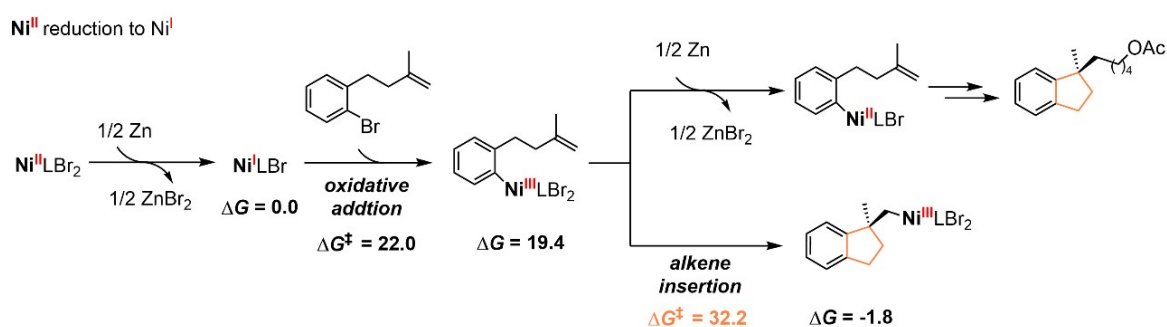

Figure S4. Study of the proposed mechanism for the reduction of Ni(II) to Ni(I).

**5. Transition states of 5-exo and 6-endo alkene insertions mediated by Ni(II) and Ni(III) species.**

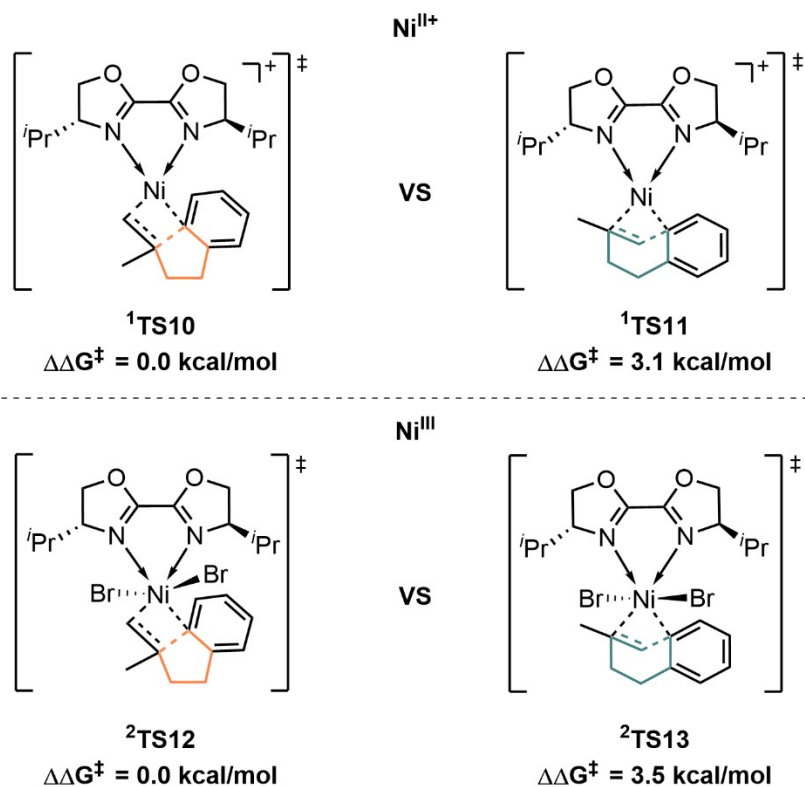

Figure S5. Transition states of 5-exo and 6-endo alkene insertions mediated by Ni(II) and Ni(III) species.

**6. Geometrical structures and Gibbs free energy barriers of key transition states.**

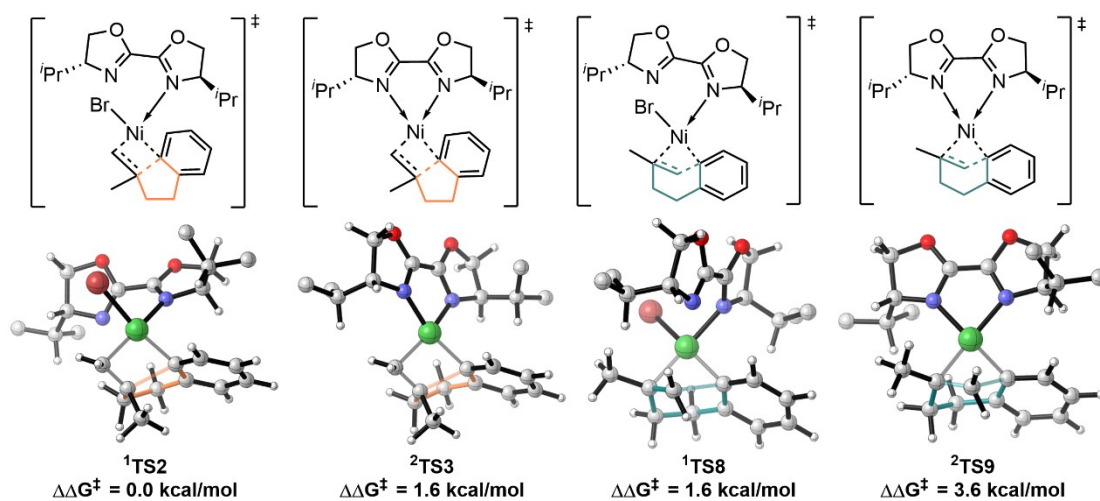

Figure S6. Geometrical structures and Gibbs free energy barriers of key transition states.

### 7. DFT-computed thermodynamics of Ni<sup>III</sup>-alkyl species.

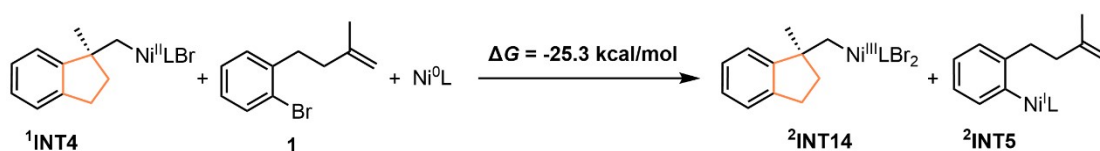

Figure S7. DFT-computed thermodynamics of Ni<sup>III</sup>-alkyl species.

### 8. Transition states of HBr departure ( $^2\text{TS17}$ ), and hydrogen atom transfer ( $^2\text{TS18}$ ).

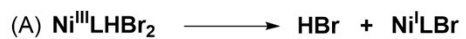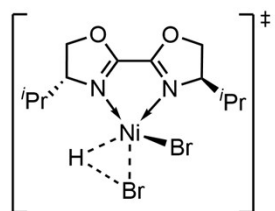

${}^2\text{TS17}$

$\Delta G^\ddagger = -7.5 \text{ kcal/mol}$

$\Delta\Delta G^\ddagger = 3.0 \text{ kcal/mol}$

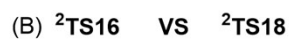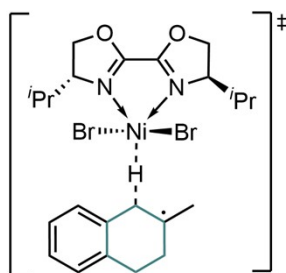

${}^2\text{TS16}$

$\Delta G^\ddagger = -0.1 \text{ kcal/mol}$

$\Delta\Delta G^\ddagger = 2.0 \text{ kcal/mol}$

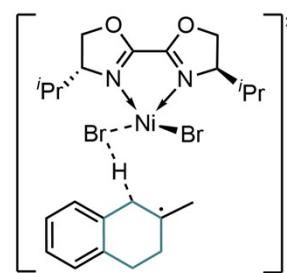

${}^2\text{TS18}$

$\Delta G^\ddagger = 5.6 \text{ kcal/mol}$

$\Delta\Delta G^\ddagger = 7.7 \text{ kcal/mol}$

Figure S8. Transition states of HBr departure ( ${}^2\text{TS17}$ ), and hydrogen atom transfer ( ${}^2\text{TS18}$ ).

## 9. Energies and free energies of calculated structures.

Table S1. Electronic Energies and Free Energies (in Hartree) of the Structures Calculated at the (U)B3LYP-D3/def2-TZVP (SMD: N, N-Dimethylacetamide)// (U)B3LYP-D3/6-31G(d)-LANL2DZ Level of Theory

| Structures         | ZPVE     | TCE      | TCH      | TCG      | $E_{\text{sol}}$ | $G_{\text{sol}}(E_{\text{sol}}+\text{TCG})$ | Imaginary Frequency |
|--------------------|----------|----------|----------|----------|------------------|---------------------------------------------|---------------------|
| 1                  | 0.209836 | 0.221922 | 0.222866 | 0.171644 | -3001.363127     | -3001.191483                                | —                   |
| 2                  | 0.167313 | 0.178188 | 0.179132 | 0.129820 | -2960.100929     | -2959.971109                                | —                   |
| 3                  | 0.380165 | 0.399128 | 0.400072 | 0.335732 | -813.107120      | -812.771388                                 | —                   |
| 5                  | 0.198712 | 0.207740 | 0.208684 | 0.164917 | -426.584394      | -426.419477                                 | —                   |
| <sup>1</sup> INT1  | 0.528208 | 0.559257 | 0.560201 | 0.472099 | -5239.385878     | -5238.913779                                | —                   |
| <sup>1</sup> INT2  | 0.529567 | 0.561032 | 0.561976 | 0.472693 | -5239.442087     | -5238.969394                                | —                   |
| <sup>3</sup> INT2  | 0.528048 | 0.560177 | 0.561122 | 0.469033 | -5239.420552     | -5238.951519                                | —                   |
| <sup>1</sup> INT3  | 0.528973 | 0.560603 | 0.561547 | 0.463793 | -5239.415820     | -5238.952027                                | —                   |
| <sup>1</sup> INT4  | 0.531878 | 0.561594 | 0.562538 | 0.472193 | -5239.458371     | -5238.986178                                | —                   |
| <sup>2</sup> INT5  | 0.525544 | 0.555575 | 0.556519 | 0.462053 | -2665.179244     | -2664.717191                                | —                   |
| <sup>2</sup> INT6  | 0.527170 | 0.555945 | 0.556890 | 0.466990 | -2665.192858     | -2664.725868                                | —                   |
| <sup>2</sup> INT7  | 0.696740 | 0.737897 | 0.738841 | 0.618696 | -5625.306914     | -5624.688218                                | —                   |
| <sup>2</sup> INT8  | 0.695633 | 0.736854 | 0.737798 | 0.620796 | -5625.310279     | -5624.689483                                | —                   |
| <sup>2</sup> INT9  | 0.697163 | 0.738211 | 0.739155 | 0.619376 | -5625.325605     | -5624.706229                                | —                   |
| <sup>1</sup> INT10 | 0.530274 | 0.561187 | 0.562131 | 0.467000 | -5239.426657     | -5238.959657                                | —                   |
| <sup>1</sup> INT11 | 0.531644 | 0.561776 | 0.562720 | 0.470810 | -5239.451897     | -5238.981087                                | —                   |
| <sup>2</sup> INT12 | 0.526505 | 0.555879 | 0.556824 | 0.464716 | -2665.182570     | -2664.717854                                | —                   |
| <sup>2</sup> INT13 | 0.527715 | 0.556309 | 0.557253 | 0.467858 | -2665.189647     | -2664.721789                                | —                   |
| <sup>2</sup> INT14 | 0.531526 | 0.564176 | 0.565120 | 0.465334 | -7813.672628     | -7813.207294                                | —                   |
| <sup>2</sup> INT15 | 0.207659 | 0.216908 | 0.217852 | 0.173351 | -427.113194      | -426.939843                                 | —                   |
| <sup>2</sup> INT16 | 0.207464 | 0.217447 | 0.218391 | 0.170766 | -427.143131      | -426.972365                                 | —                   |
| <sup>1</sup> TS1   | 0.526186 | 0.557707 | 0.558651 | 0.469308 | -5239.363577     | -5238.894269                                | 132.30i             |
| <sup>1</sup> TS2   | 0.528376 | 0.558867 | 0.559811 | 0.472657 | -5239.402372     | -5238.929715                                | 252.33i             |
| <sup>3</sup> TS2   | 0.527441 | 0.558125 | 0.559070 | 0.470258 | -5239.389361     | -5238.919103                                | 329.30i             |
| <sup>2</sup> TS3   | 0.526339 | 0.554346 | 0.555290 | 0.468258 | -2665.140233     | -2664.671975                                | 289.44i             |
| <sup>2</sup> TS4   | 0.693886 | 0.735124 | 0.736068 | 0.617024 | -5625.282872     | -5624.665848                                | 261.99i             |
| <sup>2</sup> TS5   | 0.696178 | 0.736324 | 0.737268 | 0.621879 | -5625.306171     | -5624.684292                                | 48.63i              |
| <sup>2</sup> TS6   | 0.697677 | 0.737999 | 0.738943 | 0.621204 | -5625.317427     | -5624.696223                                | 277.06i             |
| <sup>2</sup> TS7   | 0.695020 | 0.735828 | 0.736772 | 0.619248 | -4282.782249     | -4282.163001                                | 337.05i             |
| <sup>1</sup> TS8   | 0.529134 | 0.559148 | 0.560092 | 0.468682 | -5239.401044     | -5238.932362                                | 300.32i             |
| <sup>2</sup> TS9   | 0.527007 | 0.554685 | 0.555629 | 0.470245 | -2665.139578     | -2664.669333                                | 334.92i             |
| <sup>1</sup> TS10  | 0.528922 | 0.557013 | 0.557958 | 0.470524 | -2665.036362     | -2664.565838                                | 247.34i             |
| <sup>1</sup> TS11  | 0.528481 | 0.556592 | 0.557536 | 0.470681 | -2665.031210     | -2664.560529                                | 236.96i             |
| <sup>2</sup> TS12  | 0.529766 | 0.562369 | 0.563313 | 0.464541 | -7813.616494     | -7813.151953                                | 313.00i             |
| <sup>2</sup> TS13  | 0.529299 | 0.562360 | 0.563304 | 0.462163 | -7813.610047     | -7813.147884                                | 300.25i             |
| <sup>2</sup> TS14  | 0.529037 | 0.561736 | 0.562681 | 0.463076 | -7813.631216     | -7813.168140                                | 303.03i             |
| <sup>2</sup> TS15  | 0.206844 | 0.215857 | 0.216801 | 0.172595 | -427.110500      | -426.937905                                 | 453.03i             |
| <sup>2</sup> TS16  | 0.525345 | 0.558281 | 0.559225 | 0.457174 | -7813.666004     | -7813.208830                                | 311.26i             |

|                                     |          |          |          |          |              |              |                 |
|-------------------------------------|----------|----------|----------|----------|--------------|--------------|-----------------|
| <sup>2</sup> TS17                   | 0.324937 | 0.347295 | 0.348239 | 0.274898 | -7387.067226 | -7386.792328 | 99.67 <i>i</i>  |
| <sup>2</sup> TS18                   | 0.524281 | 0.557735 | 0.558679 | 0.455097 | -7813.654819 | -7813.199722 | 649.34 <i>i</i> |
| Ni <sup>0</sup> L                   | 0.315984 | 0.334070 | 0.335014 | 0.272421 | -2237.968628 | -2237.696206 | —               |
| Ni <sup>0</sup> LBr                 | 0.318374 | 0.338784 | 0.339728 | 0.270959 | -4812.275187 | -4812.004228 | —               |
| Ni <sup>II</sup> LBr <sub>2</sub>   | 0.321229 | 0.342885 | 0.343830 | 0.272489 | -7386.504617 | -7386.232128 | —               |
| Ni <sup>III</sup> LHBr <sub>2</sub> | 0.327021 | 0.349646 | 0.350590 | 0.277136 | -7387.074259 | -7386.797122 | —               |

**ZPVE** = zero-point vibrational energy; **TCE** = thermal correction to energy; **TCH** = thermal correction to enthalpy; **TCG** = thermal correction to Gibbs free energy.



## 10. Cartesian coordinates of the structures.

### 1

|    |             |             |             |
|----|-------------|-------------|-------------|
| Br | 0.67643100  | -1.92202100 | -0.00083400 |
| C  | 1.40872700  | -0.14205700 | 0.02648700  |
| C  | 2.75331700  | 0.00032500  | -0.31577500 |
| C  | 3.33186900  | 1.26935300  | -0.31316100 |
| C  | 2.56137500  | 2.38035400  | 0.03201300  |
| C  | 1.22015700  | 2.21364800  | 0.37324500  |
| C  | 0.60560300  | 0.95189800  | 0.38250100  |
| C  | -0.86075000 | 0.82487900  | 0.71861000  |
| H  | -1.02335000 | -0.06623100 | 1.33311700  |
| C  | -1.74462500 | 0.75028500  | -0.55317700 |
| C  | -3.20897300 | 0.53874200  | -0.23666500 |
| C  | -4.10571400 | 1.52028400  | -0.37966800 |
| H  | -3.82097400 | 2.50563900  | -0.74183800 |
| H  | -5.15748500 | 1.37505200  | -0.14444700 |
| C  | -3.59390800 | -0.83726100 | 0.25157000  |
| H  | -3.32368400 | -1.60064800 | -0.49057300 |
| H  | -4.66782100 | -0.91333400 | 0.44850500  |
| H  | -3.06142100 | -1.10241200 | 1.17423600  |
| H  | -1.60758400 | 1.67497500  | -1.12608700 |
| H  | -1.37851200 | -0.07369600 | -1.17969200 |
| H  | -1.17709700 | 1.68789500  | 1.31519400  |
| H  | 0.62145500  | 3.08005900  | 0.64441200  |
| H  | 3.00287300  | 3.37289700  | 0.03878500  |
| H  | 4.37907500  | 1.38264000  | -0.57870900 |
| H  | 3.33697700  | -0.87479700 | -0.57960400 |

### 2

|   |             |             |             |
|---|-------------|-------------|-------------|
| C | -0.19493500 | 0.28727700  | 0.48791000  |
| H | 0.11055100  | -0.68446200 | 0.08649400  |
| H | -0.25148100 | 0.17998500  | 1.57836800  |
| C | -1.58091500 | 0.62607300  | -0.04251800 |
| H | -1.92123200 | 1.59435100  | 0.35023800  |
| C | 0.83612100  | 1.35724500  | 0.11496400  |
| H | 0.53632900  | 2.32614300  | 0.54417400  |
| C | 2.24072700  | 1.06803300  | 0.62752100  |
| H | 2.93064800  | 1.88356800  | 0.40844400  |
| H | 2.25339300  | 0.85732700  | 1.69857300  |
| O | -2.46282100 | -0.42026400 | 0.38682500  |
| C | -3.78025600 | -0.43674900 | 0.04028500  |
| O | -4.47544000 | -1.33386500 | 0.44959200  |
| C | -4.29346100 | 0.68046500  | -0.85038300 |

|    |             |             |             |
|----|-------------|-------------|-------------|
| H  | -4.13495600 | 1.66328300  | -0.39289000 |
| H  | -3.78017500 | 0.68155000  | -1.81859700 |
| H  | -5.36028900 | 0.52307600  | -1.00920200 |
| Br | 3.04151200  | -0.53341700 | -0.23690200 |
| H  | 0.87117600  | 1.49241600  | -0.97334100 |
| H  | -1.56449300 | 0.69132100  | -1.13870700 |

**3**

|   |             |             |             |
|---|-------------|-------------|-------------|
| C | -0.54716900 | 1.33037900  | 0.46566700  |
| C | -2.02035700 | 1.09625400  | 0.89873500  |
| C | -2.47134200 | -0.30901500 | 0.51966000  |
| C | -2.07160700 | -1.51831900 | 1.08810500  |
| C | -2.58124800 | -2.71605000 | 0.57730200  |
| C | -3.47890800 | -2.70070300 | -0.49575600 |
| C | -3.87239900 | -1.48826400 | -1.07083300 |
| C | -3.36376700 | -0.29523600 | -0.55861200 |
| C | -3.61329900 | 1.11928100  | -1.03335600 |
| H | -3.09271700 | 1.29881500  | -1.98361900 |
| H | -4.67492900 | 1.32451400  | -1.21509600 |
| C | -3.03136000 | 1.99034200  | 0.10963100  |
| H | -2.56786800 | 2.91442600  | -0.25266300 |
| H | -3.84305200 | 2.28475500  | 0.78491700  |
| H | -4.56874600 | -1.47773800 | -1.90633500 |
| H | -3.87310900 | -3.63639300 | -0.88360700 |
| H | -2.28096600 | -3.66323500 | 1.01763300  |
| H | -1.37468100 | -1.53345200 | 1.92285600  |
| C | -2.12624000 | 1.34787100  | 2.41343800  |
| H | -1.42868400 | 0.71425900  | 2.97430600  |
| H | -1.89078100 | 2.39300300  | 2.65003300  |
| H | -3.13821800 | 1.13463100  | 2.77491300  |
| H | -0.24878600 | 2.34119200  | 0.78249600  |
| H | 0.07643300  | 0.63038200  | 1.03765800  |
| C | 2.13164900  | 0.20865700  | -0.84474400 |
| H | 2.10524000  | 0.19313800  | 0.25153300  |
| H | 1.75998600  | -0.76860600 | -1.17753900 |
| C | 3.57909900  | 0.36005300  | -1.30434700 |
| H | 3.99069300  | 1.33138100  | -1.00600900 |
| H | 3.64243100  | 0.29922600  | -2.39516000 |
| C | 1.23566400  | 1.32983100  | -1.38898700 |
| H | 1.59882000  | 2.30116700  | -1.02057200 |
| H | 1.33436500  | 1.36140700  | -2.48327100 |
| C | -0.25146100 | 1.17019000  | -1.03162100 |
| H | -0.82432800 | 1.91656400  | -1.59609800 |
| H | -0.60028800 | 0.18683900  | -1.37227500 |

|   |            |             |             |
|---|------------|-------------|-------------|
| O | 4.39814600 | -0.72125400 | -0.83038200 |
| C | 5.01172400 | -0.69482400 | 0.38333200  |
| O | 5.58291600 | -1.68790800 | 0.76444300  |
| C | 4.98467800 | 0.59832700  | 1.18323200  |
| H | 5.52776200 | 1.39203900  | 0.65716800  |
| H | 3.96590800 | 0.95567900  | 1.36344600  |
| H | 5.47506900 | 0.40667000  | 2.13772800  |

**5**

|   |             |             |             |
|---|-------------|-------------|-------------|
| C | -3.00740400 | 0.31416100  | 0.11176700  |
| C | -2.75717900 | -1.05901400 | 0.10341800  |
| C | -1.44628600 | -1.52502400 | -0.00289600 |
| C | -0.37106200 | -0.63007800 | -0.09965000 |
| C | -0.62901800 | 0.75936900  | -0.10424900 |
| C | -1.94194400 | 1.21426400  | 0.00451100  |
| H | -4.02513000 | 0.68526100  | 0.19863600  |
| H | -3.57926700 | -1.76553000 | 0.18235400  |
| H | -1.24741000 | -2.59466700 | -0.00185900 |
| H | -2.13593400 | 2.28502000  | 0.00126500  |
| C | 0.54237700  | 1.69678800  | -0.30502000 |
| C | 1.82486200  | 1.17090100  | 0.35561800  |
| C | 1.01495000  | -1.10141200 | -0.17817000 |
| C | 2.06825100  | -0.29014100 | 0.03018000  |
| H | 2.68165400  | 1.78062500  | 0.04217500  |
| H | 1.75732400  | 1.27937600  | 1.45078600  |
| H | 0.72571000  | 1.79326400  | -1.38692800 |
| H | 0.30304300  | 2.70130500  | 0.06276800  |
| C | 3.49046300  | -0.77271500 | 0.03365500  |
| H | 3.97322900  | -0.55865100 | 0.99849600  |
| H | 3.55965000  | -1.85005000 | -0.14957500 |
| H | 4.08631600  | -0.25509700 | -0.73143600 |
| H | 1.17275400  | -2.16345100 | -0.36166500 |

**<sup>1</sup>INT1**

|   |             |             |             |
|---|-------------|-------------|-------------|
| C | -1.08567100 | 3.53342500  | -0.75761200 |
| H | -1.13346200 | 3.73786700  | -1.83156700 |
| H | -0.77668700 | 4.43629900  | -0.22845400 |
| C | -0.24383200 | 2.27025700  | -0.42117800 |
| N | -1.28207000 | 1.25556600  | -0.17236100 |
| C | -2.40750300 | 1.88189200  | -0.07615000 |
| C | -3.55565100 | 1.08548900  | 0.32828600  |
| N | -3.31657900 | -0.13000900 | 0.69595000  |
| C | -4.61813200 | -0.77942200 | 0.91804300  |
| H | -4.65094100 | -1.14155500 | 1.95224700  |

|    |             |             |             |
|----|-------------|-------------|-------------|
| C  | -4.77826100 | -1.99711100 | -0.01980200 |
| C  | -6.10183800 | -2.72308900 | 0.25388700  |
| H  | -6.19747300 | -3.00347600 | 1.31019300  |
| H  | -6.16844800 | -3.63872500 | -0.34375000 |
| H  | -6.96737400 | -2.10039100 | -0.00874800 |
| C  | -4.61722000 | -1.62494600 | -1.49900500 |
| H  | -5.37920400 | -0.90724800 | -1.83072400 |
| H  | -3.62728400 | -1.19161000 | -1.67747800 |
| H  | -4.71381800 | -2.51796700 | -2.12634300 |
| H  | -3.94508100 | -2.66209900 | 0.24135800  |
| C  | -5.63466300 | 0.38561200  | 0.71468600  |
| H  | -6.14223800 | 0.68023700  | 1.63689300  |
| H  | -6.37905500 | 0.19551900  | -0.06185500 |
| O  | -4.82668000 | 1.52112800  | 0.27468200  |
| Ni | -1.43543200 | -0.71206000 | 0.17155100  |
| Br | 3.91763400  | 0.42087200  | -1.62077200 |
| C  | 4.48762000  | -0.47852000 | -0.01096600 |
| C  | 5.59120400  | 0.05796000  | 0.65161700  |
| C  | 6.05362600  | -0.54999500 | 1.81865400  |
| C  | 5.40738400  | -1.68665000 | 2.30631200  |
| C  | 4.30732600  | -2.20516800 | 1.62523200  |
| C  | 3.81347700  | -1.62207700 | 0.44679900  |
| C  | 2.57718100  | -2.17527800 | -0.21615400 |
| H  | 2.70691200  | -2.17745600 | -1.30314100 |
| C  | 1.32773700  | -1.33144900 | 0.15308200  |
| C  | 0.03662000  | -1.73259400 | -0.53947900 |
| C  | -0.90726800 | -2.59467200 | 0.11114500  |
| H  | -0.66677400 | -3.01283700 | 1.09262400  |
| H  | -1.54474400 | -3.24617500 | -0.49280500 |
| C  | 0.07862900  | -1.66691000 | -2.05854200 |
| H  | 0.43391000  | -0.68543700 | -2.40078200 |
| H  | -0.91798600 | -1.82884000 | -2.48388700 |
| H  | 0.74908500  | -2.42400900 | -2.49517700 |
| H  | 1.19542900  | -1.36472400 | 1.24195900  |
| H  | 1.55604600  | -0.29078000 | -0.10285300 |
| H  | 2.41940000  | -3.21429500 | 0.09461100  |
| H  | 3.80434500  | -3.08994900 | 2.00815700  |
| H  | 5.75930100  | -2.16994000 | 3.21355500  |
| H  | 6.91341800  | -0.13502100 | 2.33701900  |
| H  | 6.08101700  | 0.94044300  | 0.25452200  |
| O  | -2.44108300 | 3.20590000  | -0.31351100 |
| H  | 0.35393900  | 1.95234200  | -1.28138300 |
| C  | 0.69299000  | 2.39591400  | 0.80370200  |
| C  | 1.89184300  | 3.29534000  | 0.47431400  |

|   |             |            |             |
|---|-------------|------------|-------------|
| H | 2.57377300  | 3.35156400 | 1.32991600  |
| H | 1.57772800  | 4.32098500 | 0.23829700  |
| H | 2.45863800  | 2.90163400 | -0.37717500 |
| C | -0.04267600 | 2.84954500 | 2.07137800  |
| H | 0.64619000  | 2.85583500 | 2.92315200  |
| H | -0.86682300 | 2.17013200 | 2.31325600  |
| H | -0.44925700 | 3.86409900 | 1.97315500  |
| H | 1.06752500  | 1.38229100 | 0.98481500  |

**<sup>1</sup>INT2**

|    |             |             |             |
|----|-------------|-------------|-------------|
| C  | -3.53021100 | 2.54801800  | 0.52599000  |
| H  | -3.56157400 | 3.18630900  | 1.41299600  |
| H  | -4.46237400 | 2.64409200  | -0.03106400 |
| C  | -3.11376700 | 1.08091500  | 0.83745800  |
| N  | -1.71032600 | 1.06021100  | 0.39380800  |
| C  | -1.48853000 | 2.14974800  | -0.24376600 |
| C  | -0.14249400 | 2.29918600  | -0.80403300 |
| N  | 0.70856200  | 1.37417900  | -0.52130500 |
| C  | 2.00597100  | 1.76958800  | -1.11489900 |
| H  | 2.35940700  | 0.94327600  | -1.73689100 |
| C  | 3.07485200  | 2.05355200  | -0.03572400 |
| C  | 4.41282300  | 2.40773300  | -0.69898800 |
| H  | 4.73080700  | 1.62060500  | -1.39293700 |
| H  | 5.19231800  | 2.51327600  | 0.06275400  |
| H  | 4.36786100  | 3.35520500  | -1.25250300 |
| C  | 2.62578500  | 3.11462100  | 0.97530300  |
| H  | 2.44181300  | 4.08974500  | 0.50476300  |
| H  | 1.71114800  | 2.80211500  | 1.49066500  |
| H  | 3.40068800  | 3.26001700  | 1.73528100  |
| H  | 3.20867800  | 1.11313700  | 0.50269200  |
| C  | 1.60309000  | 2.99575600  | -1.98510200 |
| H  | 1.56846200  | 2.77565100  | -3.05510600 |
| H  | 2.20909400  | 3.88524500  | -1.81143300 |
| O  | 0.23175900  | 3.32092500  | -1.57011900 |
| Ni | -0.02196900 | -0.09460300 | 0.61289000  |
| Br | -1.07355100 | -1.70599100 | 1.90004700  |
| C  | 1.67214100  | -0.90552700 | 0.82546600  |
| C  | 2.33940300  | -0.74093700 | 2.04423200  |
| C  | 3.68331800  | -1.10726400 | 2.18287600  |
| C  | 4.36562200  | -1.66147100 | 1.09827700  |
| C  | 3.69014800  | -1.87100400 | -0.10654000 |
| C  | 2.34353400  | -1.50864900 | -0.25567200 |
| C  | 1.59826600  | -1.81659000 | -1.53611300 |
| H  | 0.97152200  | -0.95719000 | -1.80640300 |

|   |             |             |             |
|---|-------------|-------------|-------------|
| C | 0.68633100  | -3.06429400 | -1.38245800 |
| C | -0.40523400 | -3.10852500 | -2.42656700 |
| C | -0.34325800 | -3.89797200 | -3.50387000 |
| H | 0.49471600  | -4.57208800 | -3.66733100 |
| H | -1.12950200 | -3.90801400 | -4.25575300 |
| C | -1.56933600 | -2.18524400 | -2.16267700 |
| H | -2.07670800 | -2.46947400 | -1.23168300 |
| H | -2.29740300 | -2.18537500 | -2.98050800 |
| H | -1.22699500 | -1.15400000 | -2.00263300 |
| H | 1.30931600  | -3.96533800 | -1.42322800 |
| H | 0.23050800  | -3.02621200 | -0.38585900 |
| H | 2.29161800  | -1.97731100 | -2.37145700 |
| H | 4.21242100  | -2.32872700 | -0.94568700 |
| H | 5.41106800  | -1.94474100 | 1.19258000  |
| H | 4.19217500  | -0.96007400 | 3.13302500  |
| H | 1.80838700  | -0.31098400 | 2.88938900  |
| O | -2.45268000 | 3.06800000  | -0.33485400 |
| H | -3.12479500 | 0.87338700  | 1.91081900  |
| C | -3.93456000 | -0.01532800 | 0.12107500  |
| C | -5.32653700 | -0.13096800 | 0.75647500  |
| H | -5.89424300 | -0.94182200 | 0.28765700  |
| H | -5.90963500 | 0.79156200  | 0.62893600  |
| H | -5.25816400 | -0.34515000 | 1.82923000  |
| C | -4.02401400 | 0.19774900  | -1.39525700 |
| H | -4.49302600 | -0.67123400 | -1.86814500 |
| H | -3.03460300 | 0.31888800  | -1.84633700 |
| H | -4.63004400 | 1.07557700  | -1.65398700 |
| H | -3.38384200 | -0.94244300 | 0.31493300  |

**<sup>3</sup>INT2**

|   |             |            |             |
|---|-------------|------------|-------------|
| C | 3.50430600  | 2.47496200 | -0.81406000 |
| H | 3.51807000  | 2.95347800 | -1.79707400 |
| H | 4.43402900  | 2.68863400 | -0.28651500 |
| C | 3.12179400  | 0.97006600 | -0.86343700 |
| N | 1.70888200  | 0.99717700 | -0.43512000 |
| C | 1.46790700  | 2.17025800 | 0.02015000  |
| C | 0.13974400  | 2.45600700 | 0.59157800  |
| N | -0.71991100 | 1.51140200 | 0.67369100  |
| C | -1.98550500 | 2.11913500 | 1.13796400  |
| H | -2.31183900 | 1.58220800 | 2.03486400  |
| C | -3.09882200 | 1.99779200 | 0.07024800  |
| C | -4.40909600 | 2.59951300 | 0.59622500  |
| H | -4.70103600 | 2.14922100 | 1.55282900  |
| H | -5.21803700 | 2.41559600 | -0.11835000 |

|    |             |             |             |
|----|-------------|-------------|-------------|
| H  | -4.34057900 | 3.68611600  | 0.73952100  |
| C  | -2.68946500 | 2.59678500  | -1.27972300 |
| H  | -2.48725800 | 3.67448100  | -1.21517300 |
| H  | -1.79945100 | 2.09666100  | -1.67485700 |
| H  | -3.49250800 | 2.45251400  | -2.00937100 |
| H  | -3.25423700 | 0.92646000  | -0.07735400 |
| C  | -1.55559800 | 3.57622000  | 1.49089200  |
| H  | -1.51496300 | 3.77098100  | 2.56547900  |
| H  | -2.14933000 | 4.34856600  | 1.00017300  |
| O  | -0.18687000 | 3.69295700  | 0.97720700  |
| Ni | 0.06169700  | -0.36504000 | -0.55755800 |
| Br | 1.43338000  | -2.06834200 | -1.67228400 |
| C  | -1.76291600 | -1.04340000 | -0.83141500 |
| C  | -2.36749500 | -0.90400400 | -2.08597200 |
| C  | -3.72173400 | -1.20319000 | -2.28349400 |
| C  | -4.48595500 | -1.67664300 | -1.21662700 |
| C  | -3.88893500 | -1.85690200 | 0.03509700  |
| C  | -2.53895800 | -1.54416200 | 0.23613300  |
| C  | -1.88855700 | -1.73095800 | 1.59117200  |
| H  | -1.36905400 | -0.79898700 | 1.85608000  |
| C  | -0.86467000 | -2.90093900 | 1.60797000  |
| C  | 0.19727600  | -2.73038500 | 2.66999800  |
| C  | 0.20301600  | -3.43102100 | 3.80834800  |
| H  | -0.55786500 | -4.17913700 | 4.01880900  |
| H  | 0.97126500  | -3.29188000 | 4.56584900  |
| C  | 1.26041300  | -1.70789500 | 2.34494200  |
| H  | 1.76814700  | -1.97410500 | 1.40809300  |
| H  | 2.00910800  | -1.61290300 | 3.13790900  |
| H  | 0.82114000  | -0.71056700 | 2.18457400  |
| H  | -1.40476900 | -3.84538500 | 1.73953300  |
| H  | -0.37745000 | -2.94982900 | 0.62463200  |
| H  | -2.63709100 | -1.89554700 | 2.37585600  |
| H  | -4.48189500 | -2.23766000 | 0.86575000  |
| H  | -5.53747100 | -1.91552900 | -1.35729800 |
| H  | -4.17389700 | -1.07278300 | -3.26451300 |
| H  | -1.77935500 | -0.54570100 | -2.93023400 |
| O  | 2.41589200  | 3.10476900  | -0.04873800 |
| H  | 3.15260900  | 0.56833800  | -1.87920200 |
| C  | 3.95658300  | 0.04234700  | 0.04858100  |
| C  | 5.37755100  | -0.10424400 | -0.51242100 |
| H  | 5.95371800  | -0.81232200 | 0.09263000  |
| H  | 5.92234200  | 0.84976600  | -0.50428000 |
| H  | 5.36028000  | -0.47945200 | -1.54197000 |
| C  | 3.96817700  | 0.49220200  | 1.51484800  |

|   |            |             |             |
|---|------------|-------------|-------------|
| H | 4.49321100 | -0.24735600 | 2.12853700  |
| H | 2.95418300 | 0.58813000  | 1.91571700  |
| H | 4.48396700 | 1.45178900  | 1.65040900  |
| H | 3.46086700 | -0.93182500 | -0.01918900 |

**<sup>1</sup>INT3**

|    |             |             |             |
|----|-------------|-------------|-------------|
| C  | 3.76991300  | -1.69490200 | -0.70107700 |
| C  | 1.59001600  | -1.32506200 | -0.95396200 |
| H  | 4.41133800  | -1.64499100 | -1.58640700 |
| H  | 4.22455100  | -2.34891800 | 0.04394200  |
| N  | 1.93740000  | -0.18556500 | -0.50484600 |
| O  | 2.50641600  | -2.30223800 | -1.10649600 |
| C  | 0.18174300  | -1.65972200 | -1.22227500 |
| C  | -2.04603000 | -1.73393300 | -1.04310000 |
| C  | -1.56892200 | -2.60891400 | -2.22948500 |
| H  | -2.71229200 | -0.93796200 | -1.38337700 |
| H  | -1.89307900 | -3.64903100 | -2.18048100 |
| H  | -1.82956900 | -2.18716600 | -3.20415700 |
| N  | -0.78831200 | -1.10108500 | -0.59486400 |
| O  | -0.10992800 | -2.59736700 | -2.13185400 |
| Ni | -0.50775200 | 0.31281400  | 0.76231500  |
| C  | -3.67480800 | 2.92641600  | -1.62527800 |
| C  | -4.08586100 | 1.96213800  | -0.70414200 |
| C  | -3.12717400 | 1.21311700  | -0.00863700 |
| C  | -1.75737300 | 1.41672000  | -0.21565100 |
| C  | -1.35020500 | 2.40692100  | -1.12872400 |
| C  | -2.30982000 | 3.15018100  | -1.82789700 |
| H  | -4.40974300 | 3.50758000  | -2.17660600 |
| H  | -5.14536300 | 1.79262500  | -0.52439900 |
| H  | -3.46116500 | 0.46414300  | 0.70796200  |
| H  | -1.98640400 | 3.91620100  | -2.53134200 |
| C  | 0.12194600  | 2.72684100  | -1.22079100 |
| C  | 0.61857400  | 3.47678300  | 0.05255100  |
| C  | 0.72193300  | 1.90990000  | 2.02140100  |
| H  | 0.39678000  | 1.58593600  | 3.00431700  |
| H  | 1.66816000  | 1.50970000  | 1.67116500  |
| C  | 0.08709800  | 2.90868500  | 1.35700600  |
| H  | 1.71507500  | 3.45673000  | 0.06090300  |
| H  | 0.30865200  | 4.52696400  | -0.01512300 |
| H  | 0.69643300  | 1.79883900  | -1.30054400 |
| H  | 0.34841700  | 3.34183200  | -2.10042800 |
| C  | 3.35980100  | -0.30062900 | -0.14384300 |
| H  | 3.38710500  | -0.31855100 | 0.95475900  |
| C  | 4.18263600  | 0.90457600  | -0.63650100 |



|    |             |             |             |
|----|-------------|-------------|-------------|
| H  | 3.74925300  | 1.77990400  | -0.13173800 |
| C  | 5.64749600  | 0.77356900  | -0.19688500 |
| H  | 6.21594300  | 1.67058300  | -0.46593900 |
| H  | 5.73021500  | 0.63314700  | 0.88752100  |
| H  | 6.13488000  | -0.08043500 | -0.68523100 |
| C  | 4.05809800  | 1.13333900  | -2.14839500 |
| H  | 4.48776800  | 0.30366800  | -2.72369800 |
| H  | 3.00960900  | 1.24344800  | -2.44360300 |
| H  | 4.59394200  | 2.04315300  | -2.44124200 |
| C  | -2.72522000 | -2.48810600 | 0.12121100  |
| H  | -2.80415800 | -1.75504600 | 0.93466300  |
| C  | -1.89461100 | -3.66522700 | 0.64663000  |
| H  | -1.76361900 | -4.44783900 | -0.11197200 |
| H  | -0.91387100 | -3.32822100 | 0.99303400  |
| H  | -2.40349400 | -4.12436000 | 1.50114900  |
| C  | -4.13967000 | -2.91591400 | -0.29363700 |
| H  | -4.11385900 | -3.63944200 | -1.11964900 |
| H  | -4.65559600 | -3.39755100 | 0.54373600  |
| H  | -4.74208900 | -2.05764800 | -0.61581300 |
| C  | -1.12077700 | 3.59374500  | 1.94359200  |
| H  | -1.90498000 | 3.73024700  | 1.19320100  |
| H  | -1.53446700 | 3.03596100  | 2.78848800  |
| H  | -0.82578500 | 4.59269600  | 2.29501000  |
| Br | 0.45115000  | -1.26385000 | 2.38197700  |

**<sup>1</sup>INT4**

|    |             |             |             |
|----|-------------|-------------|-------------|
| C  | -2.95514800 | -2.85300600 | 0.69818800  |
| C  | -0.87235500 | -2.12219500 | 0.49720000  |
| H  | -3.58493900 | -2.89891100 | 1.58701600  |
| H  | -3.20659800 | -3.67627200 | 0.02367000  |
| N  | -1.49239100 | -1.24288900 | -0.20060700 |
| O  | -1.56669200 | -3.06709800 | 1.13727700  |
| C  | 0.58543300  | -2.01493100 | 0.50466400  |
| C  | 2.54577500  | -1.28115500 | -0.24135500 |
| C  | 2.74357000  | -2.35743600 | 0.85150600  |
| H  | 3.07653800  | -0.36762200 | 0.02314100  |
| H  | 3.39391300  | -3.18583000 | 0.57065400  |
| H  | 3.06193100  | -1.92230500 | 1.80287200  |
| N  | 1.09455400  | -1.02714200 | -0.14949400 |
| O  | 1.39838700  | -2.91128500 | 1.06270300  |
| Ni | -0.20096300 | 0.18459000  | -0.99183700 |
| C  | 1.72228900  | 0.71361400  | 3.58267100  |
| C  | 2.87600000  | 0.85963000  | 2.80604800  |
| C  | 2.81313900  | 1.50694900  | 1.56407300  |

|    |             |             |             |
|----|-------------|-------------|-------------|
| C  | 1.59086400  | 1.99016000  | 1.10139800  |
| C  | 0.44475900  | 1.88842400  | 1.90570600  |
| C  | 0.50262700  | 1.24202700  | 3.13901900  |
| H  | 1.77824800  | 0.21739200  | 4.54830200  |
| H  | 3.82932100  | 0.49010800  | 3.17745400  |
| H  | 3.71690700  | 1.64052500  | 0.97290000  |
| H  | -0.38454500 | 1.16595900  | 3.76369600  |
| C  | -0.73276300 | 2.55624800  | 1.22997000  |
| C  | -0.07327100 | 3.37312000  | 0.09510200  |
| C  | 1.10770400  | 1.57827000  | -1.35624000 |
| H  | 2.07866900  | 1.08667400  | -1.51138600 |
| H  | 0.83046000  | 2.07657200  | -2.29050600 |
| C  | 1.26613800  | 2.64656700  | -0.23642400 |
| H  | -0.71765000 | 3.45732900  | -0.78246600 |
| H  | 0.15230000  | 4.38321100  | 0.46067200  |
| H  | -1.41441300 | 1.80972800  | 0.80639900  |
| H  | -1.32106600 | 3.17337800  | 1.91953300  |
| C  | -2.93497200 | -1.46602700 | -0.00648400 |
| H  | -3.40611100 | -1.50258400 | -0.99226700 |
| C  | -3.56806500 | -0.30488000 | 0.79481400  |
| H  | -3.33067800 | 0.59336700  | 0.21409100  |
| C  | -5.09375100 | -0.46221000 | 0.84110800  |
| H  | -5.54968400 | 0.39331600  | 1.35090700  |
| H  | -5.51948900 | -0.51769500 | -0.16749900 |
| H  | -5.39495600 | -1.36576100 | 1.38861100  |
| C  | -2.97055000 | -0.15683800 | 2.20020600  |
| H  | -3.22477900 | -1.00622400 | 2.84746800  |
| H  | -1.88062800 | -0.06482000 | 2.16975300  |
| H  | -3.36225500 | 0.74641600  | 2.68035900  |
| C  | 2.92905600  | -1.69486800 | -1.68112800 |
| H  | 2.59485200  | -0.86843900 | -2.32033900 |
| C  | 2.21385200  | -2.96717400 | -2.15497800 |
| H  | 2.47385400  | -3.83812900 | -1.54020200 |
| H  | 1.12615600  | -2.84164000 | -2.13462800 |
| H  | 2.49922500  | -3.19684800 | -3.18704300 |
| C  | 4.45437100  | -1.81673400 | -1.80491900 |
| H  | 4.84700000  | -2.63780200 | -1.19098800 |
| H  | 4.73920500  | -2.02183200 | -2.84224400 |
| H  | 4.95685300  | -0.89285900 | -1.49419200 |
| C  | 2.34759200  | 3.65315400  | -0.67544100 |
| H  | 2.53775900  | 4.39697900  | 0.10862100  |
| H  | 3.29530700  | 3.14957700  | -0.90330400 |
| H  | 2.02834700  | 4.18117600  | -1.58123800 |
| Br | -1.90327300 | 1.23795300  | -2.19382100 |

**<sup>2</sup>INT5**

|    |             |             |             |
|----|-------------|-------------|-------------|
| C  | 4.33234900  | 0.01829300  | -0.18085100 |
| C  | 2.40718900  | 1.11969200  | 0.05069400  |
| H  | 4.94155700  | -0.26709500 | 0.68032200  |
| H  | 4.97770300  | 0.14335400  | -1.05333400 |
| N  | 1.96130800  | -0.05449500 | -0.25911800 |
| O  | 3.73608700  | 1.31693600  | 0.11811600  |
| C  | 1.41915200  | 2.13733500  | 0.36418900  |
| C  | -0.63387200 | 2.93868400  | 0.66227900  |
| C  | 0.41002800  | 4.09840900  | 0.68342000  |
| H  | -1.14968500 | 2.87193900  | 1.62703000  |
| H  | 0.26945400  | 4.83663200  | -0.10989600 |
| H  | 0.46687200  | 4.61006900  | 1.64714100  |
| N  | 0.20063800  | 1.74239000  | 0.49948800  |
| O  | 1.70085500  | 3.45010800  | 0.45221600  |
| Ni | -0.02462200 | -0.32980000 | 0.04361400  |
| C  | -4.23949500 | -1.83237500 | 1.84212200  |
| C  | -3.76852900 | -0.54896900 | 2.12189400  |
| C  | -2.52428200 | -0.14605300 | 1.62372300  |
| C  | -1.70133600 | -0.97724800 | 0.83644000  |
| C  | -2.20391500 | -2.28217900 | 0.58544300  |
| C  | -3.45062300 | -2.69391600 | 1.07566900  |
| H  | -5.20311300 | -2.16430300 | 2.22249000  |
| H  | -4.36594500 | 0.13090700  | 2.72792700  |
| H  | -2.17689500 | 0.85867900  | 1.86376700  |
| H  | -3.81011100 | -3.70084100 | 0.86158300  |
| C  | -1.39896700 | -3.23788100 | -0.27244300 |
| C  | -1.59064600 | -3.03402500 | -1.80180900 |
| C  | 0.03391500  | -1.25820400 | -2.46806600 |
| H  | 0.29506700  | -0.26193600 | -2.81327200 |
| H  | 0.85806900  | -1.95341600 | -2.32371500 |
| C  | -1.24285400 | -1.63635900 | -2.27918700 |
| H  | -0.96807200 | -3.76888700 | -2.32901200 |
| H  | -2.63491300 | -3.25681100 | -2.05383400 |
| H  | -0.33017100 | -3.11269900 | -0.04798500 |
| H  | -1.65524100 | -4.28014000 | -0.03927600 |
| C  | 3.12539000  | -0.93525500 | -0.43619300 |
| H  | 3.13257700  | -1.28819800 | -1.47495500 |
| C  | 3.02222300  | -2.17007900 | 0.48603300  |
| H  | 2.10685600  | -2.68826100 | 0.16709500  |
| C  | 4.21452000  | -3.11058900 | 0.26692300  |
| H  | 4.08944100  | -4.03092300 | 0.84724100  |
| H  | 4.32101900  | -3.38971300 | -0.78874700 |

|   |             |             |             |
|---|-------------|-------------|-------------|
| H | 5.15644600  | -2.64811600 | 0.58984000  |
| C | 2.84230800  | -1.79202400 | 1.96149200  |
| H | 1.93942100  | -1.18714200 | 2.09631900  |
| H | 2.73745200  | -2.69541400 | 2.57196200  |
| H | 3.70294900  | -1.23179900 | 2.34980100  |
| C | -1.70700700 | 2.99121700  | -0.44789600 |
| H | -2.28488900 | 2.06641500  | -0.32194200 |
| C | -1.09522000 | 2.97185600  | -1.85400400 |
| H | -0.48680000 | 3.86407700  | -2.05211300 |
| H | -0.46446300 | 2.08722100  | -1.98921000 |
| H | -1.88627400 | 2.94181100  | -2.61129600 |
| C | -2.64357900 | 4.18847000  | -0.24327800 |
| H | -2.11191400 | 5.14244600  | -0.35930600 |
| H | -3.45287400 | 4.17489000  | -0.98134000 |
| H | -3.09902500 | 4.17464000  | 0.75428700  |
| C | -2.39736100 | -0.69395100 | -2.49323600 |
| H | -2.97291000 | -0.60215800 | -1.56478000 |
| H | -2.06256500 | 0.30333700  | -2.79488600 |
| H | -3.07510700 | -1.08488400 | -3.26449900 |

## **<sup>2</sup>INT6**

|    |             |             |             |
|----|-------------|-------------|-------------|
| C  | 1.33223600  | -2.90892800 | 1.10417500  |
| H  | 1.60603500  | -3.93576600 | 0.84603300  |
| H  | 1.80425700  | -2.62546500 | 2.04751700  |
| O  | -0.11833600 | -2.89012700 | 1.31457500  |
| C  | -0.58096100 | -1.99079400 | 0.43191600  |
| N  | 0.24773100  | -1.37451600 | -0.33697300 |
| C  | 1.59371200  | -1.88629200 | -0.04223600 |
| H  | 2.19512200  | -1.04889600 | 0.31358500  |
| C  | 2.27585400  | -2.47658700 | -1.29092500 |
| C  | 2.30614200  | -1.44971800 | -2.43102900 |
| H  | 2.85616100  | -0.55320600 | -2.12300700 |
| H  | 2.80008200  | -1.87197200 | -3.31406900 |
| H  | 1.29770100  | -1.13099800 | -2.71046000 |
| C  | 3.69755900  | -2.94002700 | -0.93750700 |
| H  | 4.19363700  | -3.36677100 | -1.81617000 |
| H  | 4.29665600  | -2.09041000 | -0.58778700 |
| H  | 3.70665500  | -3.70397200 | -0.15001900 |
| H  | 1.68385000  | -3.34744600 | -1.61294600 |
| Ni | -0.64352200 | 0.32298500  | -1.18984700 |
| C  | 0.43869700  | 1.94704100  | -1.57273900 |
| C  | 1.13681200  | 2.69907100  | -0.40588700 |
| C  | 2.16965100  | 1.81818000  | 0.28931600  |
| C  | 3.44588900  | 1.46640300  | -0.15054300 |

|                         |             |             |             |
|-------------------------|-------------|-------------|-------------|
| C                       | 4.26749600  | 0.67737500  | 0.66575000  |
| C                       | 3.81468000  | 0.24054600  | 1.91584700  |
| C                       | 2.52685000  | 0.57875000  | 2.35273600  |
| C                       | 1.71369900  | 1.36293000  | 1.53560200  |
| C                       | 0.29857800  | 1.83289800  | 1.77468600  |
| H                       | -0.39639200 | 1.01607100  | 1.53403300  |
| H                       | 0.10587400  | 2.12929500  | 2.81266800  |
| C                       | 0.14515100  | 2.99543400  | 0.76557600  |
| H                       | -0.87963300 | 3.10438200  | 0.39723500  |
| H                       | 0.42600600  | 3.93367900  | 1.26222000  |
| H                       | 2.17145900  | 0.24334100  | 3.32523700  |
| H                       | 4.46435000  | -0.35823900 | 2.54944900  |
| H                       | 5.26847200  | 0.41467100  | 0.33191900  |
| H                       | 3.80899700  | 1.81511700  | -1.11415000 |
| C                       | 1.78087200  | 4.00627400  | -0.91323700 |
| H                       | 2.47777600  | 3.80577100  | -1.73587500 |
| H                       | 1.00632100  | 4.68150400  | -1.29744800 |
| H                       | 2.33098800  | 4.53103200  | -0.12015400 |
| H                       | -0.20498500 | 2.68283500  | -2.08909500 |
| H                       | 1.21089800  | 1.67093100  | -2.31189700 |
| N                       | -2.28853000 | -0.71006300 | -0.54833100 |
| C                       | -1.98683700 | -1.63688200 | 0.30189000  |
| O                       | -2.96554800 | -2.20561300 | 1.02555600  |
| C                       | -4.19767400 | -1.56119300 | 0.58007700  |
| H                       | -4.66342600 | -1.10451100 | 1.45660000  |
| H                       | -4.85436200 | -2.34147900 | 0.18870900  |
| C                       | -3.74938900 | -0.53091200 | -0.50214400 |
| H                       | -4.15154600 | -0.81241800 | -1.48357100 |
| C                       | -4.13654000 | 0.94001800  | -0.23845700 |
| C                       | -5.66008000 | 1.11397500  | -0.30381000 |
| H                       | -5.93151700 | 2.17006100  | -0.20110600 |
| H                       | -6.06858600 | 0.75194000  | -1.25524000 |
| H                       | -6.16075900 | 0.56887700  | 0.50740600  |
| C                       | -3.55322200 | 1.48322200  | 1.07049000  |
| H                       | -3.79439900 | 2.54611800  | 1.17993400  |
| H                       | -2.46509000 | 1.38320500  | 1.07837400  |
| H                       | -3.95739300 | 0.96485000  | 1.94944800  |
| H                       | -3.68298700 | 1.50757100  | -1.06287500 |
| <b><sup>2</sup>INT7</b> |             |             |             |
| C                       | -2.85698000 | 2.95529300  | 1.16878900  |
| C                       | -2.84007200 | 1.44107500  | 0.83112400  |
| C                       | -0.81267700 | 2.14306500  | 1.38262400  |
| H                       | -2.92742800 | 3.59194600  | 0.28205200  |

|   |             |             |             |
|---|-------------|-------------|-------------|
| H | -3.60705900 | 3.24589100  | 1.90464200  |
| H | -3.29348300 | 0.86342300  | 1.64915200  |
| N | -1.39691200 | 1.13427400  | 0.84230900  |
| O | -1.53735200 | 3.20241400  | 1.75776000  |
| C | 0.63046500  | 2.03726300  | 1.59199800  |
| C | 2.60119100  | 1.00754800  | 1.61346800  |
| C | 2.71185700  | 2.41120100  | 2.27572500  |
| H | 3.28173000  | 0.92420700  | 0.76082500  |
| H | 3.08245600  | 2.39726500  | 3.30254900  |
| H | 3.30127500  | 3.11574900  | 1.68317900  |
| N | 1.21474000  | 0.99281300  | 1.12345600  |
| O | 1.33937100  | 2.91593600  | 2.31234100  |
| C | 2.84277500  | -0.21027200 | 2.53331800  |
| H | 2.59888700  | -1.08191300 | 1.91185600  |
| C | 1.90933600  | -0.23186500 | 3.75015500  |
| H | 2.08022000  | -1.13809900 | 4.34143700  |
| H | 2.07631100  | 0.62732300  | 4.41255800  |
| H | 0.85947600  | -0.22894700 | 3.43909300  |
| C | 4.32116000  | -0.29845100 | 2.93245700  |
| H | 4.50545400  | -1.19639400 | 3.53234900  |
| H | 4.96622800  | -0.34587300 | 2.04728200  |
| H | 4.62947000  | 0.56580600  | 3.53574300  |
| C | -3.52922900 | 1.00077300  | -0.46880900 |
| H | -3.44483300 | -0.08871100 | -0.48118000 |
| C | -5.01700200 | 1.37028000  | -0.43703300 |
| H | -5.16375400 | 2.45906300  | -0.45229300 |
| H | -5.53210900 | 0.95398200  | -1.30944500 |
| H | -5.50661100 | 0.96822800  | 0.45732500  |
| C | -2.82990700 | 1.52484000  | -1.72452700 |
| H | -3.32539500 | 1.13323400  | -2.62055400 |
| H | -2.84479900 | 2.61912400  | -1.78197900 |
| H | -1.78893900 | 1.18565200  | -1.73236300 |
| C | 2.44141600  | 0.81312500  | -2.23999000 |
| H | 2.30589800  | 0.57319100  | -1.18374500 |
| H | 3.29111700  | 1.50418700  | -2.32314200 |
| C | 1.17172800  | 1.50316400  | -2.70680900 |
| H | 0.33514400  | 0.79468800  | -2.68092000 |
| H | 1.28403800  | 1.90521800  | -3.72110600 |
| C | 2.71178900  | -0.48130900 | -3.00897700 |
| H | 1.86020200  | -1.16031400 | -2.89165800 |
| H | 2.81803500  | -0.27340800 | -4.08560600 |
| C | 3.98872300  | -1.18937100 | -2.57979600 |
| H | 4.15721700  | -2.10819200 | -3.14200300 |
| H | 4.86762200  | -0.54613100 | -2.65604900 |

|    |             |             |             |
|----|-------------|-------------|-------------|
| O  | 0.90322700  | 2.56091200  | -1.76205500 |
| C  | -0.11024200 | 3.43832100  | -1.94671300 |
| O  | -0.50643800 | 4.07860000  | -0.99729900 |
| C  | -0.66002100 | 3.59946000  | -3.35028200 |
| H  | 0.13327600  | 3.90362600  | -4.04254500 |
| H  | -1.08615100 | 2.66184800  | -3.71978200 |
| H  | -1.43645500 | 4.36417500  | -3.32826200 |
| Br | 3.93456800  | -1.76349900 | -0.67002000 |
| Ni | -0.00165600 | -0.29078900 | 0.08126900  |
| C  | -0.35750100 | -1.86682400 | -1.09862800 |
| C  | -1.10543000 | -3.08551300 | -0.48117400 |
| C  | -2.55957100 | -2.73204000 | -0.20031800 |
| C  | -3.62744100 | -2.67729200 | -1.09621700 |
| C  | -4.90328800 | -2.33418200 | -0.63135100 |
| C  | -5.10618600 | -2.03570700 | 0.72000800  |
| C  | -4.03351700 | -2.08373200 | 1.61977200  |
| C  | -2.76869500 | -2.44206900 | 1.15641200  |
| C  | -1.47712800 | -2.58537300 | 1.92847100  |
| H  | -1.04150400 | -1.59313100 | 2.11836400  |
| H  | -1.61048100 | -3.07285300 | 2.90213900  |
| C  | -0.58485900 | -3.39875800 | 0.95853400  |
| H  | 0.47806500  | -3.15374300 | 1.05620800  |
| H  | -0.70897400 | -4.46901300 | 1.17293400  |
| H  | -4.19310200 | -1.86592800 | 2.67428900  |
| H  | -6.10052200 | -1.77486300 | 1.07413700  |
| H  | -5.74130800 | -2.30069900 | -1.32350200 |
| H  | -3.47368400 | -2.90894800 | -2.14743700 |
| C  | -0.98473100 | -4.32441800 | -1.38958800 |
| H  | -1.34298700 | -4.10349700 | -2.40268400 |
| H  | 0.06689200  | -4.62652700 | -1.47287200 |
| H  | -1.55745200 | -5.17944400 | -1.00458200 |
| H  | 0.63976400  | -2.24100300 | -1.40007900 |
| H  | -0.86627300 | -1.59751200 | -2.04131300 |

**<sup>2</sup>INT8**

|   |             |            |             |
|---|-------------|------------|-------------|
| C | -3.46632900 | 2.17511400 | 1.11681900  |
| C | -2.85933700 | 1.75223300 | -0.23920600 |
| C | -1.43829100 | 1.34750000 | 1.42029800  |
| H | -3.84940600 | 3.19460000 | 1.15372900  |
| H | -4.21973500 | 1.46451600 | 1.46760500  |
| H | -3.52486100 | 1.06339100 | -0.75731100 |
| N | -1.65925300 | 1.01088800 | 0.19587100  |
| O | -2.33648500 | 2.09603900 | 2.05491800  |
| C | -0.16171100 | 0.92444900 | 1.99567100  |

|   |             |             |             |
|---|-------------|-------------|-------------|
| C | 1.81036600  | -0.09578700 | 1.98842400  |
| C | 1.67161600  | 0.83247600  | 3.22584300  |
| H | 2.66631900  | 0.20381100  | 1.38476700  |
| H | 1.85121900  | 0.34913900  | 4.18665100  |
| H | 2.26963600  | 1.74006800  | 3.12563600  |
| N | 0.59263100  | 0.22986500  | 1.22765200  |
| O | 0.26093300  | 1.25999700  | 3.21089900  |
| C | 1.89649800  | -1.61172900 | 2.26563900  |
| H | 1.85817300  | -2.07866300 | 1.27421100  |
| C | 0.71904100  | -2.13548900 | 3.09781900  |
| H | 0.77515000  | -3.22584300 | 3.18996100  |
| H | 0.72009900  | -1.72044800 | 4.11400600  |
| H | -0.24104600 | -1.89172100 | 2.63145000  |
| C | 3.24764900  | -1.95577700 | 2.90704000  |
| H | 3.34774900  | -3.03901300 | 3.03633700  |
| H | 4.08209500  | -1.61170500 | 2.28423300  |
| H | 3.35499000  | -1.49674800 | 3.89891400  |
| C | -2.46694700 | 2.90414000  | -1.19269000 |
| H | -1.84047600 | 2.43895700  | -1.96522400 |
| C | -3.72404500 | 3.47501500  | -1.86416200 |
| H | -4.40153900 | 3.92563700  | -1.12670300 |
| H | -3.45644200 | 4.25833500  | -2.58138800 |
| H | -4.28023300 | 2.69857900  | -2.40310000 |
| C | -1.64258900 | 4.00548400  | -0.51095100 |
| H | -1.32302300 | 4.74381000  | -1.25565800 |
| H | -2.23119200 | 4.54604400  | 0.24068900  |
| H | -0.74296300 | 3.61632800  | -0.02471700 |
| C | 4.98275700  | 0.30717500  | -0.46221300 |
| H | 4.29555800  | -0.44079000 | -0.05035100 |
| H | 5.58506700  | 0.70646300  | 0.36259400  |
| C | 4.14257500  | 1.41706100  | -1.07256800 |
| H | 3.49445700  | 0.99623700  | -1.84306400 |
| H | 4.76908500  | 2.20781900  | -1.50610300 |
| C | 5.88554000  | -0.36889500 | -1.50790700 |
| H | 5.24120200  | -0.72272400 | -2.33525800 |
| H | 6.56559800  | 0.37014700  | -1.95635200 |
| C | 6.66497600  | -1.50999100 | -0.94514200 |
| H | 6.20588500  | -2.17701300 | -0.22059700 |
| H | 7.61373600  | -1.81014300 | -1.37806800 |
| O | 3.34827000  | 1.99298500  | -0.00882300 |
| C | 2.18044800  | 2.62751700  | -0.24727300 |
| O | 1.54343900  | 3.03052900  | 0.70770600  |
| C | 1.71653300  | 2.77217900  | -1.67900600 |
| H | 2.51575400  | 3.11342400  | -2.34377700 |



|    |             |             |             |
|----|-------------|-------------|-------------|
| H  | 1.36807400  | 1.79389500  | -2.03396100 |
| H  | 0.88785700  | 3.47854100  | -1.70588100 |
| Ni | -0.27457600 | -0.11943400 | -0.61572400 |
| C  | -1.38354200 | -0.63490400 | -2.12841400 |
| C  | -2.19386700 | -1.94656700 | -1.90575100 |
| C  | -3.05983000 | -1.85255000 | -0.65287400 |
| C  | -4.29665700 | -1.23240700 | -0.48870100 |
| C  | -4.89140800 | -1.20086800 | 0.78047100  |
| C  | -4.25254900 | -1.79612300 | 1.87287600  |
| C  | -3.03124500 | -2.46044900 | 1.69851500  |
| C  | -2.44878600 | -2.49930100 | 0.43338500  |
| C  | -1.17346300 | -3.18237300 | -0.00937800 |
| H  | -0.29174500 | -2.61831500 | 0.31806800  |
| H  | -1.07443400 | -4.19447300 | 0.40084400  |
| C  | -1.28444000 | -3.16364800 | -1.55213100 |
| H  | -0.30973900 | -3.10059200 | -2.03979800 |
| H  | -1.78126100 | -4.08346200 | -1.88694600 |
| H  | -2.55595300 | -2.96046000 | 2.53952800  |
| H  | -4.72066400 | -1.77161000 | 2.85367600  |
| H  | -5.86262800 | -0.72910100 | 0.91226300  |
| H  | -4.80588400 | -0.78514000 | -1.33993800 |
| C  | -3.02301800 | -2.22573200 | -3.17441600 |
| H  | -3.67034600 | -1.37605600 | -3.42466000 |
| H  | -2.36007700 | -2.39889700 | -4.02997900 |
| H  | -3.65842500 | -3.11107800 | -3.04565200 |
| H  | -0.74427100 | -0.75673000 | -3.00955600 |
| H  | -2.08609900 | 0.18568800  | -2.33287300 |
| Br | 1.67058100  | -1.12510700 | -1.49258100 |

**<sup>2</sup>INT9**

|   |             |            |             |
|---|-------------|------------|-------------|
| C | 2.96988800  | 2.69605300 | -2.03198600 |
| H | 2.90428800  | 3.25982600 | -2.96344000 |
| H | 3.79028700  | 3.08453900 | -1.42187600 |
| O | 3.30298800  | 1.31194500 | -2.37785900 |
| C | 2.45720700  | 0.57091100 | -1.64504700 |
| N | 1.54579500  | 1.13859100 | -0.95242800 |
| C | 1.63837900  | 2.58427700 | -1.23896700 |
| H | 1.71578900  | 3.10977400 | -0.28946600 |
| C | 0.37767300  | 3.09455800 | -1.97120500 |
| C | 0.39159100  | 4.62853600 | -2.03391300 |
| H | 1.23212300  | 4.99738900 | -2.63669400 |
| H | -0.52880800 | 5.00425500 | -2.49394900 |
| H | 0.47666600  | 5.06326000 | -1.03196500 |
| C | 0.19391300  | 2.47670000 | -3.36390000 |

|    |             |             |             |
|----|-------------|-------------|-------------|
| H  | -0.77532900 | 2.76780800  | -3.78313900 |
| H  | 0.96618600  | 2.81955900  | -4.06365900 |
| H  | 0.22593000  | 1.38339500  | -3.33094900 |
| H  | -0.46644100 | 2.78836200  | -1.33990800 |
| Ni | 0.13755900  | -0.62358000 | 0.04975300  |
| C  | -1.07842400 | 0.52760100  | 1.07686000  |
| C  | -0.42702800 | 1.05471100  | 2.39073300  |
| C  | 0.50678300  | 2.23566100  | 2.14576800  |
| C  | 0.17474900  | 3.56626600  | 1.89442600  |
| C  | 1.19544300  | 4.52062700  | 1.78761400  |
| C  | 2.53656700  | 4.13882500  | 1.91046400  |
| C  | 2.87044700  | 2.79740500  | 2.14082900  |
| C  | 1.85176900  | 1.85451500  | 2.26534000  |
| C  | 1.94327700  | 0.37484700  | 2.56056200  |
| H  | 2.14501300  | -0.18761300 | 1.63336500  |
| H  | 2.74740500  | 0.11540100  | 3.25805100  |
| C  | 0.53420100  | 0.05602700  | 3.10852900  |
| H  | 0.23731900  | -0.98364600 | 2.96550400  |
| H  | 0.52184200  | 0.27517100  | 4.18351900  |
| H  | 3.91200500  | 2.50181200  | 2.24686000  |
| H  | 3.32114500  | 4.88754700  | 1.83635000  |
| H  | 0.94374600  | 5.56458700  | 1.61873300  |
| H  | -0.86591500 | 3.86917900  | 1.80913800  |
| C  | -1.59854800 | 1.44231000  | 3.32196800  |
| H  | -2.29816300 | 2.12456400  | 2.82517900  |
| H  | -2.15580200 | 0.54652500  | 3.61749100  |
| H  | -1.22564600 | 1.93493200  | 4.22817300  |
| H  | -1.92035800 | -0.12696300 | 1.31432400  |
| H  | -1.43099400 | 1.38116900  | 0.49022500  |
| N  | 1.80371300  | -1.59423400 | -0.88884700 |
| C  | 2.58692600  | -0.89452200 | -1.62309900 |
| O  | 3.52989300  | -1.51222900 | -2.34143300 |
| C  | 3.25154900  | -2.94372900 | -2.15796300 |
| H  | 4.20859200  | -3.44301500 | -2.00631200 |
| H  | 2.78913400  | -3.30077300 | -3.08319000 |
| C  | 2.29787400  | -2.98686600 | -0.93836800 |
| H  | 1.44142600  | -3.64538900 | -1.09851200 |
| C  | 2.96877900  | -3.37348200 | 0.40218700  |
| C  | 3.30252400  | -4.87139500 | 0.40583400  |
| H  | 3.72102500  | -5.16587900 | 1.37426300  |
| H  | 2.40474200  | -5.47501700 | 0.23126100  |
| H  | 4.04474900  | -5.12962700 | -0.36197800 |
| C  | 4.19880100  | -2.51881600 | 0.73653100  |
| H  | 4.57962800  | -2.78780300 | 1.72769000  |

|    |             |             |             |
|----|-------------|-------------|-------------|
| H  | 3.95739100  | -1.45059400 | 0.75953800  |
| H  | 5.01835800  | -2.66726900 | 0.02170500  |
| H  | 2.20043800  | -3.19412700 | 1.16098800  |
| C  | -3.65021300 | -0.06688100 | -1.13957600 |
| H  | -3.45380800 | 0.60302900  | -0.29728800 |
| H  | -3.74394600 | 0.56430700  | -2.03277800 |
| C  | -4.97595900 | -0.76887400 | -0.89098000 |
| H  | -4.91992100 | -1.36504000 | 0.02880600  |
| H  | -5.21978500 | -1.44537500 | -1.72165500 |
| C  | -2.50107600 | -1.06966900 | -1.31063200 |
| H  | -2.48187100 | -1.76914100 | -0.46732800 |
| H  | -2.69939400 | -1.68783100 | -2.20110800 |
| C  | -1.13337700 | -0.41163500 | -1.45759800 |
| H  | -0.49460300 | -0.92692600 | -2.18594300 |
| H  | -1.19351300 | 0.64681300  | -1.71297100 |
| O  | -5.98650200 | 0.24817500  | -0.77188000 |
| C  | -7.27669600 | -0.05541500 | -0.47271600 |
| O  | -8.08531300 | 0.83982100  | -0.40654100 |
| C  | -7.62539600 | -1.51325300 | -0.23008300 |
| H  | -7.36890900 | -2.13718300 | -1.09318500 |
| H  | -7.07960300 | -1.90993800 | 0.63341500  |
| H  | -8.69675400 | -1.57821600 | -0.03962600 |
| Br | -0.50749000 | -2.80684500 | 1.15772100  |

**<sup>1</sup>INT10**

|    |             |             |             |
|----|-------------|-------------|-------------|
| C  | 4.05897800  | 1.67687700  | -1.14347300 |
| C  | 3.42690700  | 0.31948300  | -1.57636600 |
| C  | 2.00329700  | 1.43312700  | -0.31278500 |
| H  | 4.98005600  | 1.57567500  | -0.56537700 |
| H  | 4.22973400  | 2.36184000  | -1.97858000 |
| H  | 3.32531600  | 0.27342500  | -2.66784000 |
| N  | 2.07278600  | 0.36112300  | -0.99706600 |
| O  | 3.05873100  | 2.27930100  | -0.27497900 |
| C  | 0.83096200  | 1.81529600  | 0.49595500  |
| C  | -1.10396500 | 1.76353400  | 1.62891500  |
| C  | -0.28280100 | 3.02047600  | 2.02091500  |
| H  | -1.16592600 | 1.06650100  | 2.47133000  |
| H  | -0.78579900 | 3.96442600  | 1.80183100  |
| H  | 0.04729700  | 3.01266700  | 3.06158800  |
| N  | -0.22751600 | 1.10443400  | 0.63600600  |
| O  | 0.91145300  | 2.95922800  | 1.18717600  |
| Ni | -0.47712600 | -0.75899200 | 0.15443100  |
| C  | -3.05926600 | 0.72855600  | -3.52876000 |
| C  | -1.69630800 | 1.01899200  | -3.45285700 |

|    |             |             |             |
|----|-------------|-------------|-------------|
| C  | -0.94315000 | 0.54749400  | -2.37302500 |
| C  | -1.52477600 | -0.23037800 | -1.36293700 |
| C  | -2.89083600 | -0.55268200 | -1.46243000 |
| C  | -3.64515700 | -0.06099600 | -2.53955900 |
| H  | -3.65933600 | 1.10361400  | -4.35398100 |
| H  | -1.22039600 | 1.61874900  | -4.22594100 |
| H  | 0.11211000  | 0.78927400  | -2.31086700 |
| H  | -4.70388500 | -0.30762300 | -2.60402000 |
| C  | -3.52305300 | -1.51985900 | -0.48945300 |
| C  | -2.87149200 | -2.92260000 | -0.64147900 |
| C  | -1.53842100 | -3.02991700 | 0.06775200  |
| C  | -1.62838700 | -3.52423100 | 1.48829100  |
| C  | -0.34349000 | -2.83978200 | -0.57616400 |
| Br | 0.82314900  | -1.23905300 | 2.20989500  |
| H  | -1.97251400 | -4.56830300 | 1.46608200  |
| H  | -0.67686400 | -3.46031700 | 2.01311300  |
| H  | -2.37409700 | -2.95203600 | 2.05355900  |
| H  | -3.54304500 | -3.67706600 | -0.21350100 |
| H  | -2.76425600 | -3.14061600 | -1.70894100 |
| H  | -3.39944100 | -1.18553000 | 0.54995300  |
| H  | -4.60007000 | -1.60153800 | -0.67591500 |
| C  | -2.52319000 | 2.02755500  | 1.09006400  |
| H  | -2.90166600 | 1.04914700  | 0.77463500  |
| C  | -2.55032800 | 2.94761000  | -0.13578700 |
| H  | -2.22928400 | 3.96813000  | 0.10975500  |
| H  | -1.91332200 | 2.56105300  | -0.93495700 |
| H  | -3.56979700 | 3.01245100  | -0.53051800 |
| C  | -3.41983000 | 2.55344700  | 2.21995900  |
| H  | -4.45037700 | 2.67105200  | 1.86783000  |
| H  | -3.43049900 | 1.87044200  | 3.07807300  |
| H  | -3.08364100 | 3.53641100  | 2.57604600  |
| C  | 4.18339100  | -0.94782100 | -1.11534900 |
| H  | 3.55962400  | -1.79199400 | -1.43963900 |
| C  | 5.53990100  | -1.04786000 | -1.82831600 |
| H  | 5.42960700  | -1.01725700 | -2.91959100 |
| H  | 6.20917200  | -0.22852100 | -1.53446500 |
| H  | 6.04254400  | -1.98526800 | -1.56648400 |
| C  | 4.32963000  | -1.03165100 | 0.40933800  |
| H  | 3.35605000  | -1.01453700 | 0.90868700  |
| H  | 4.83350400  | -1.96479100 | 0.68609900  |
| H  | 4.93836800  | -0.20798600 | 0.80520800  |
| H  | -0.31522100 | -2.68402600 | -1.65102900 |
| H  | 0.59530400  | -3.06396000 | -0.07739300 |

**<sup>1</sup>INT11**

|    |             |             |             |
|----|-------------|-------------|-------------|
| C  | -2.98468600 | -1.15487300 | -2.25049500 |
| C  | -2.77043000 | -0.77906200 | -0.76004300 |
| C  | -0.81910900 | -1.03388900 | -1.78292600 |
| H  | -3.57938200 | -2.05573600 | -2.40888700 |
| H  | -3.39390700 | -0.33150700 | -2.84139000 |
| H  | -3.26078500 | 0.17082100  | -0.54805600 |
| N  | -1.30490000 | -0.59028000 | -0.67491500 |
| O  | -1.64025700 | -1.42656700 | -2.75720200 |
| C  | 0.62970300  | -1.20625700 | -1.88014200 |
| C  | 2.71380000  | -1.20973100 | -1.11063500 |
| C  | 2.67512400  | -1.68907800 | -2.59280500 |
| H  | 3.12526200  | -1.97291800 | -0.44459400 |
| H  | 3.28847400  | -1.09565700 | -3.27220500 |
| H  | 2.91372900  | -2.74901700 | -2.71190700 |
| N  | 1.28559100  | -1.06499600 | -0.79221600 |
| O  | 1.27430100  | -1.51421800 | -3.00951600 |
| Ni | 0.11911300  | -0.39559300 | 0.81564200  |
| C  | -0.67814300 | 3.98598800  | -1.90636200 |
| C  | -1.99775700 | 3.53527000  | -1.82259000 |
| C  | -2.39132600 | 2.77101400  | -0.72478700 |
| C  | -1.49082800 | 2.43379800  | 0.29536200  |
| C  | -0.16569800 | 2.90373100  | 0.22065900  |
| C  | 0.21908500  | 3.67443100  | -0.88571200 |
| H  | -0.35376900 | 4.58345900  | -2.75448500 |
| H  | -2.71418700 | 3.78202800  | -2.60219100 |
| H  | -3.42518200 | 2.43680900  | -0.64749100 |
| H  | 1.24458900  | 4.03460700  | -0.94165900 |
| C  | 0.85382900  | 2.57091600  | 1.29705400  |
| C  | 0.26029900  | 1.85686600  | 2.52173000  |
| C  | -0.78706200 | 0.80307000  | 2.12647600  |
| C  | -1.29095200 | 0.02150900  | 3.33454200  |
| C  | -1.93254800 | 1.57981700  | 1.46703000  |
| H  | -0.47314900 | -0.50770300 | 3.82771900  |
| H  | -1.76112400 | 0.69914900  | 4.06900600  |
| H  | -2.04699700 | -0.72171100 | 3.05094000  |
| C  | 3.46448000  | 0.11521600  | -0.84860100 |
| H  | 3.28903200  | 0.32191500  | 0.21364300  |
| C  | 2.91276600  | 1.28453400  | -1.67353300 |
| H  | 3.42256900  | 2.21356600  | -1.39537400 |
| H  | 3.06921400  | 1.13945400  | -2.75064000 |
| H  | 1.84262800  | 1.43546700  | -1.50100400 |
| C  | 4.97163700  | -0.07554600 | -1.06297100 |
| H  | 5.51309400  | 0.83985500  | -0.80098700 |

|    |             |             |             |
|----|-------------|-------------|-------------|
| H  | 5.36344300  | -0.88765200 | -0.43952100 |
| H  | 5.20876000  | -0.30510600 | -2.11073600 |
| C  | -3.23007200 | -1.82622700 | 0.27764700  |
| H  | -2.93849500 | -1.41474100 | 1.25112600  |
| C  | -4.75760400 | -1.97041900 | 0.25429700  |
| H  | -5.11190200 | -2.39996900 | -0.69170700 |
| H  | -5.08988000 | -2.63653000 | 1.05736100  |
| H  | -5.25473900 | -1.00256100 | 0.39297800  |
| C  | -2.51562200 | -3.17429700 | 0.11568000  |
| H  | -2.86183100 | -3.87853500 | 0.87937900  |
| H  | -2.71266500 | -3.62921400 | -0.86397800 |
| H  | -1.43305100 | -3.06122400 | 0.23638300  |
| H  | -2.37574300 | 2.24068900  | 2.23595100  |
| H  | -2.74993600 | 0.91638600  | 1.17212600  |
| H  | 1.62920700  | 1.92763400  | 0.85886400  |
| H  | 1.36973600  | 3.49039900  | 1.60603000  |
| H  | -0.23532400 | 2.60304800  | 3.16932400  |
| H  | 1.06471600  | 1.40577200  | 3.10505000  |
| Br | 1.82348300  | -1.14006200 | 2.30038200  |

**<sup>2</sup>INT12**

|    |             |             |             |
|----|-------------|-------------|-------------|
| C  | -3.43418700 | -1.69451400 | -1.22514500 |
| C  | -2.89789200 | -0.34318400 | -0.65944500 |
| C  | -1.33865400 | -1.92091000 | -0.50109400 |
| H  | -4.30856300 | -2.08189400 | -0.69747000 |
| H  | -3.64284100 | -1.66110100 | -2.29709600 |
| H  | -2.85320000 | 0.42082800  | -1.44363700 |
| N  | -1.51838200 | -0.67018400 | -0.28239800 |
| O  | -2.34274000 | -2.64882400 | -1.02119900 |
| C  | -0.02988300 | -2.48786500 | -0.17817600 |
| C  | 2.09873300  | -2.47847500 | 0.43703100  |
| C  | 1.72752700  | -3.85182400 | -0.19577000 |
| H  | 2.48152900  | -2.61328600 | 1.45491400  |
| H  | 2.33686300  | -4.12886400 | -1.05785700 |
| H  | 1.72581300  | -4.67167600 | 0.52824900  |
| N  | 0.80277500  | -1.78039300 | 0.49931500  |
| O  | 0.35684900  | -3.67836300 | -0.66908200 |
| Ni | 0.08875400  | 0.39494300  | 0.56742300  |
| C  | 0.70899900  | 3.94134500  | -2.66938800 |
| C  | 0.07951100  | 2.73991400  | -2.99850900 |
| C  | -0.09519100 | 1.76752500  | -2.00933800 |
| C  | 0.34741000  | 1.93000600  | -0.67807300 |
| C  | 0.99202300  | 3.15351900  | -0.37806000 |
| C  | 1.15676000  | 4.14082300  | -1.36269400 |

|   |             |             |             |
|---|-------------|-------------|-------------|
| H | 0.84580300  | 4.71833700  | -3.41858800 |
| H | -0.27621300 | 2.56720200  | -4.01338300 |
| H | -0.58877200 | 0.83529600  | -2.28858100 |
| H | 1.64691200  | 5.08038800  | -1.10636300 |
| C | 1.55380800  | 3.43588300  | 1.00697600  |
| C | 0.77388800  | 2.81170000  | 2.17858200  |
| C | 0.89023100  | 1.30702300  | 2.33953100  |
| C | 2.28664600  | 0.75836400  | 2.55034700  |
| C | -0.21677800 | 0.54665200  | 2.68346100  |
| H | 2.95641100  | 1.02677000  | 1.72692200  |
| H | 2.72535100  | 1.16933800  | 3.47249600  |
| H | 2.27257200  | -0.33245700 | 2.63602500  |
| C | 3.11886300  | -1.62727300 | -0.35817700 |
| H | 3.21215300  | -0.68951100 | 0.20254100  |
| C | 2.62281400  | -1.27080200 | -1.76613000 |
| H | 3.38671700  | -0.69391500 | -2.29837100 |
| H | 2.40980400  | -2.16589100 | -2.36563500 |
| H | 1.72148700  | -0.65134900 | -1.71891800 |
| C | 4.49123200  | -2.31428900 | -0.38168900 |
| H | 5.23585900  | -1.66186200 | -0.84996100 |
| H | 4.84163000  | -2.55284900 | 0.63033700  |
| H | 4.46932100  | -3.24745800 | -0.95937300 |
| C | -3.65932300 | 0.25127300  | 0.54499900  |
| H | -3.08134200 | 1.14114900  | 0.82832400  |
| C | -5.06842100 | 0.69303400  | 0.12902100  |
| H | -5.68782500 | -0.16438200 | -0.16629000 |
| H | -5.57793400 | 1.19039700  | 0.96145400  |
| H | -5.03702700 | 1.39370700  | -0.71386400 |
| C | -3.68598100 | -0.69507600 | 1.75174400  |
| H | -4.17107700 | -0.20762600 | 2.60468600  |
| H | -4.24803200 | -1.61401500 | 1.54016100  |
| H | -2.67061000 | -0.97106600 | 2.05247900  |
| H | -1.19319500 | 1.00961300  | 2.81115700  |
| H | -0.10465800 | -0.45773800 | 3.08657600  |
| H | 2.60003600  | 3.09714600  | 1.05474200  |
| H | 1.59658800  | 4.52162900  | 1.16693500  |
| H | -0.28491400 | 3.07925000  | 2.08183600  |
| H | 1.13979800  | 3.27192300  | 3.11151600  |

**<sup>2</sup>INT13**

|   |             |            |            |
|---|-------------|------------|------------|
| C | -1.48281300 | 2.84923200 | 1.12478700 |
| C | -1.73046900 | 1.66362700 | 0.14419400 |
| C | 0.45678400  | 1.98583600 | 0.45023500 |
| H | -1.89202000 | 3.80378200 | 0.78664700 |

|    |             |             |             |
|----|-------------|-------------|-------------|
| H  | -1.83574300 | 2.64117300  | 2.13806300  |
| H  | -2.28749400 | 0.86638300  | 0.64005500  |
| N  | -0.36902800 | 1.17644200  | -0.12761200 |
| O  | -0.02841400 | 2.99821700  | 1.18870300  |
| C  | 1.87015900  | 1.73789000  | 0.25275800  |
| C  | 3.65830600  | 0.61506200  | -0.46810200 |
| C  | 4.08904300  | 1.82590600  | 0.41049300  |
| H  | 4.09452800  | 0.69396200  | -1.47033600 |
| H  | 4.71541600  | 1.56049700  | 1.26421600  |
| H  | 4.57939900  | 2.61522600  | -0.16701200 |
| N  | 2.19913900  | 0.78981500  | -0.57171400 |
| O  | 2.84225800  | 2.37182200  | 0.93469700  |
| Ni | 0.62247800  | -0.46306700 | -0.92199200 |
| C  | -4.13356400 | -0.86245700 | 1.84848900  |
| C  | -4.56434900 | -0.93318200 | 0.52049500  |
| C  | -3.70031900 | -1.42906700 | -0.45607900 |
| C  | -2.40567000 | -1.86659600 | -0.14063700 |
| C  | -1.97213000 | -1.79379900 | 1.19749000  |
| C  | -2.84682900 | -1.29219100 | 2.17280000  |
| H  | -4.79504500 | -0.48188000 | 2.62280800  |
| H  | -5.56529300 | -0.60717500 | 0.24852300  |
| H  | -4.03294600 | -1.48338000 | -1.49113500 |
| H  | -2.50601400 | -1.24044600 | 3.20574100  |
| C  | -0.56589900 | -2.20497500 | 1.59264700  |
| C  | 0.16144800  | -3.00357400 | 0.50345900  |
| C  | -0.00973100 | -2.37105300 | -0.88181200 |
| C  | 0.78030800  | -3.17543100 | -1.92245400 |
| C  | -1.50627600 | -2.43287100 | -1.22355100 |
| H  | 1.85808900  | -3.16403400 | -1.70740100 |
| H  | 0.46585500  | -4.23838000 | -1.94646900 |
| H  | 0.64466300  | -2.77600900 | -2.93626700 |
| C  | 3.99953000  | -0.78405100 | 0.09728100  |
| H  | 3.52537800  | -1.49580500 | -0.59278900 |
| C  | 3.39794100  | -1.02263700 | 1.48775000  |
| H  | 3.61481200  | -2.04228800 | 1.82364300  |
| H  | 3.80920900  | -0.33445300 | 2.23723500  |
| H  | 2.31024800  | -0.90531400 | 1.46491400  |
| C  | 5.51545200  | -1.02095900 | 0.07982700  |
| H  | 5.74784200  | -2.04283800 | 0.39824600  |
| H  | 5.93533800  | -0.87685800 | -0.92320700 |
| H  | 6.03778900  | -0.34012400 | 0.76475800  |
| C  | -2.45983500 | 2.01186000  | -1.17166100 |
| H  | -2.50617100 | 1.06550300  | -1.72686400 |
| C  | -3.89687200 | 2.46785400  | -0.88560500 |



|   |             |             |             |
|---|-------------|-------------|-------------|
| H | -3.91652800 | 3.42107300  | -0.34084000 |
| H | -4.44591400 | 2.61864000  | -1.82185600 |
| H | -4.43436800 | 1.72214000  | -0.29058300 |
| C | -1.69397200 | 3.03095100  | -2.02461700 |
| H | -2.22054100 | 3.21097900  | -2.96850600 |
| H | -1.59936400 | 3.99906200  | -1.51519300 |
| H | -0.68743000 | 2.67005800  | -2.26075800 |
| H | -1.80739200 | -3.49138500 | -1.38579600 |
| H | -1.71627600 | -1.92132400 | -2.17297600 |
| H | 0.00607600  | -1.28761800 | 1.79841100  |
| H | -0.59907900 | -2.76690600 | 2.53668200  |
| H | -0.23450900 | -4.04012400 | 0.49775800  |
| H | 1.22511800  | -3.08262200 | 0.76502300  |

**<sup>2</sup>INT14**

|    |             |             |             |
|----|-------------|-------------|-------------|
| C  | -0.62086300 | 3.81051900  | -1.53083300 |
| C  | -1.58926200 | 2.02312100  | -0.62866800 |
| H  | -0.65964000 | 4.82717100  | -1.13683200 |
| H  | -0.53035600 | 3.83746000  | -2.61887800 |
| N  | -0.36160500 | 1.76756400  | -0.38574400 |
| O  | -1.91040800 | 3.17546800  | -1.22383200 |
| C  | -2.58416600 | 1.00124800  | -0.27593800 |
| C  | -3.33123900 | -0.95961100 | 0.47105500  |
| C  | -4.52215900 | 0.00390500  | 0.17523800  |
| H  | -3.24245500 | -1.14314800 | 1.54887800  |
| H  | -5.17263200 | -0.33833500 | -0.63252500 |
| H  | -5.12210400 | 0.24189200  | 1.05495300  |
| N  | -2.16608500 | -0.15430500 | 0.08088600  |
| O  | -3.89567200 | 1.25156300  | -0.27387200 |
| Ni | -0.03951400 | -0.21731700 | 0.21412100  |
| C  | 4.30873400  | 0.30760100  | -1.08961400 |
| C  | 3.74127000  | 0.76788200  | 0.09981700  |
| C  | 2.90737900  | -0.06527600 | 0.86053900  |
| C  | 2.65729700  | -1.36265200 | 0.40752200  |
| C  | 3.23273300  | -1.82503700 | -0.78385400 |
| C  | 4.05723400  | -0.99563600 | -1.53560300 |
| H  | 4.95714600  | 0.96048000  | -1.66843000 |
| H  | 3.96231100  | 1.77232000  | 0.45153000  |
| H  | 2.46923000  | 0.29060100  | 1.78674900  |
| H  | 4.49798900  | -1.35237300 | -2.46317600 |
| C  | 2.77282900  | -3.23075100 | -1.08345800 |
| C  | 2.25285000  | -3.71699300 | 0.28693100  |
| C  | 0.28394500  | -2.19031600 | 0.70713300  |
| H  | -0.40897900 | -2.34262000 | 1.53427800  |

|    |             |             |             |
|----|-------------|-------------|-------------|
| H  | -0.05309000 | -2.64630800 | -0.22152000 |
| C  | 1.76051700  | -2.43398900 | 1.04349700  |
| H  | 1.47201000  | -4.48138500 | 0.21208000  |
| H  | 3.08158700  | -4.14942200 | 0.86167900  |
| C  | 0.44549000  | 2.90124700  | -0.84783100 |
| H  | 1.15850100  | 2.50904700  | -1.58100300 |
| C  | 1.22542500  | 3.53303600  | 0.32541300  |
| H  | 1.81827500  | 2.71238200  | 0.74539900  |
| C  | 2.18542500  | 4.60921400  | -0.19847600 |
| H  | 2.79479100  | 5.01072900  | 0.61839500  |
| H  | 2.86353700  | 4.20506200  | -0.96007200 |
| H  | 1.64218000  | 5.45338600  | -0.64382700 |
| C  | 0.31150000  | 4.05848900  | 1.43915600  |
| H  | -0.34671700 | 4.86445000  | 1.08898800  |
| H  | -0.30015600 | 3.25135400  | 1.85271700  |
| H  | 0.91658900  | 4.46680500  | 2.25607400  |
| C  | -3.36805800 | -2.31809700 | -0.25897100 |
| H  | -2.45919300 | -2.84452200 | 0.05956200  |
| C  | -3.31455700 | -2.17673100 | -1.78530100 |
| H  | -4.18576300 | -1.63535000 | -2.17711100 |
| H  | -2.40609900 | -1.65482900 | -2.10155100 |
| H  | -3.31536100 | -3.16814800 | -2.25193900 |
| C  | -4.58149500 | -3.13534400 | 0.20759700  |
| H  | -5.52511900 | -2.66585400 | -0.10004400 |
| H  | -4.56011800 | -4.13746200 | -0.23348900 |
| H  | -4.60002200 | -3.24711000 | 1.29870700  |
| C  | 1.96177400  | -2.55893000 | 2.56076400  |
| H  | 3.02504200  | -2.68215100 | 2.79526500  |
| H  | 1.58594400  | -1.67520500 | 3.08131700  |
| H  | 1.42157900  | -3.43361500 | 2.94385200  |
| Br | 0.32048000  | -0.67885000 | -2.16961400 |
| Br | -0.21223200 | 0.37456600  | 2.58783300  |
| H  | 1.96361300  | -3.18753700 | -1.82428100 |
| H  | 3.56204200  | -3.87339100 | -1.48984700 |

**<sup>2</sup>INT15**

|   |             |             |             |
|---|-------------|-------------|-------------|
| C | 2.73816700  | 0.07434500  | -0.27256300 |
| C | 2.23543000  | -1.24392900 | -0.14556000 |
| C | 0.91168800  | -1.48734300 | 0.13204400  |
| C | -0.00885500 | -0.36807200 | 0.35101400  |
| C | 0.53393800  | 0.98990800  | 0.13679800  |
| C | 1.85542200  | 1.18005200  | -0.16394200 |
| H | 3.78760400  | 0.23677800  | -0.49753100 |
| H | 2.91536500  | -2.08299000 | -0.27584100 |

|   |             |             |             |
|---|-------------|-------------|-------------|
| H | 0.53952900  | -2.50354600 | 0.23239700  |
| H | 2.22498900  | 2.18445500  | -0.36238200 |
| C | -0.59806300 | 1.98448000  | 0.08905800  |
| C | -1.78644300 | 1.14863600  | -0.46279100 |
| C | -1.15593500 | -0.49746900 | 1.39051300  |
| C | -1.52437500 | -0.29953100 | -0.03954600 |
| H | -2.75922900 | 1.51303200  | -0.10961700 |
| H | -1.79435200 | 1.19583500  | -1.55929700 |
| H | -0.83702500 | 2.36614200  | 1.09259800  |
| H | -0.37067100 | 2.85666300  | -0.53235900 |
| C | -2.20029400 | -1.40027400 | -0.82055500 |
| H | -1.98452300 | -1.30982800 | -1.89210900 |
| H | -1.86658200 | -2.39068800 | -0.49220700 |
| H | -3.28983800 | -1.35736900 | -0.69059700 |
| H | -1.28809000 | 0.30249600  | 2.11610300  |
| H | -1.28125100 | -1.49579500 | 1.80403100  |

**<sup>2</sup>INT16**

|   |             |             |             |
|---|-------------|-------------|-------------|
| C | 2.99670300  | 0.32436600  | -0.24082200 |
| C | 2.75122900  | -1.04962400 | -0.21922300 |
| C | 1.45487800  | -1.51871100 | 0.00323100  |
| C | 0.39804300  | -0.62878100 | 0.21369400  |
| C | 0.64529200  | 0.75566000  | 0.19345700  |
| C | 1.94358900  | 1.21873800  | -0.03930900 |
| H | 4.00104900  | 0.69880100  | -0.42081400 |
| H | 3.56295000  | -1.75378400 | -0.38231400 |
| H | 1.25993300  | -2.58923200 | 0.01084200  |
| H | 2.12948200  | 2.29053900  | -0.06417900 |
| C | -0.52120700 | 1.68988800  | 0.41646000  |
| C | -1.76211600 | 1.22192300  | -0.37155300 |
| C | -1.01471300 | -1.11465400 | 0.47287800  |
| C | -2.06765100 | -0.22909400 | -0.13484500 |
| H | -2.62943700 | 1.84572700  | -0.10618200 |
| H | -1.58514200 | 1.40583100  | -1.44717500 |
| H | -0.77555900 | 1.70973900  | 1.48718500  |
| H | -0.25332200 | 2.71595700  | 0.13908700  |
| C | -3.46618900 | -0.73393500 | -0.28433200 |
| H | -4.00674300 | -0.19896900 | -1.07638800 |
| H | -3.49228400 | -1.80567400 | -0.52157000 |
| H | -4.05864400 | -0.60252300 | 0.64065100  |
| H | -1.16906400 | -1.18371600 | 1.57050300  |
| H | -1.13037200 | -2.14734700 | 0.11253400  |

**<sup>1</sup>TS1**

|    |             |             |             |
|----|-------------|-------------|-------------|
| C  | 4.81819500  | 0.49775300  | 0.37640700  |
| H  | 5.50445200  | 1.03707700  | -0.28230300 |
| H  | 5.38513700  | 0.00960900  | 1.17116300  |
| C  | 3.85284900  | -0.44989400 | -0.39336300 |
| N  | 2.56883900  | 0.26848200  | -0.32243000 |
| C  | 2.72663100  | 1.24963600  | 0.50083300  |
| C  | 1.53537200  | 1.99749200  | 0.87746100  |
| N  | 0.39231400  | 1.48692800  | 0.56719600  |
| C  | -0.61997000 | 2.52263900  | 0.85078900  |
| H  | -1.40917600 | 2.08351500  | 1.46849000  |
| C  | -1.25261600 | 3.02109100  | -0.46995200 |
| C  | -2.38831200 | 4.01193500  | -0.18307800 |
| H  | -3.13975600 | 3.57649700  | 0.48706000  |
| H  | -2.89231600 | 4.29490400  | -1.11359700 |
| H  | -2.01798500 | 4.93609200  | 0.27999600  |
| C  | -0.21486600 | 3.59345300  | -1.44406800 |
| H  | 0.29918600  | 4.47268100  | -1.03434800 |
| H  | 0.53494200  | 2.83685300  | -1.69792100 |
| H  | -0.70372000 | 3.90248100  | -2.37432200 |
| H  | -1.68066400 | 2.13068900  | -0.94131700 |
| C  | 0.18591200  | 3.58273800  | 1.65463900  |
| H  | -0.01374600 | 3.54628800  | 2.72970500  |
| H  | 0.06604500  | 4.60651200  | 1.29613100  |
| O  | 1.58526100  | 3.21099800  | 1.45413300  |
| Ni | 0.66139500  | -0.20140900 | -0.66344200 |
| Br | -0.50336700 | -2.32763700 | 0.55544700  |
| C  | -0.90624300 | -0.99197800 | -1.14795900 |
| C  | -0.14367600 | -1.36020600 | -2.30181300 |
| C  | -0.63207900 | -0.94931600 | -3.57110400 |
| C  | -1.83658700 | -0.27941100 | -3.67218000 |
| C  | -2.61444800 | -0.02597100 | -2.51550100 |
| C  | -2.19744000 | -0.39655000 | -1.24727300 |
| C  | -3.02766700 | -0.14083300 | -0.01569300 |
| H  | -2.35464000 | 0.00479400  | 0.83521000  |
| C  | -4.00263900 | -1.30631800 | 0.29292600  |
| C  | -4.65626100 | -1.15420500 | 1.64878100  |
| C  | -5.90535400 | -0.69550100 | 1.78324900  |
| H  | -6.51499000 | -0.44036200 | 0.91900200  |
| H  | -6.36754000 | -0.56481600 | 2.75921600  |
| C  | -3.80401700 | -1.53552100 | 2.83538900  |
| H  | -3.56206500 | -2.60629600 | 2.80360900  |
| H  | -4.30483500 | -1.32193800 | 3.78533900  |
| H  | -2.83990100 | -1.01154900 | 2.82411200  |
| H  | -4.75874100 | -1.34783100 | -0.49993900 |

|   |             |             |             |
|---|-------------|-------------|-------------|
| H | -3.43734100 | -2.24505800 | 0.25584600  |
| H | -3.61392500 | 0.77947900  | -0.13257800 |
| H | -3.56248700 | 0.50043600  | -2.61706400 |
| H | -2.21504300 | 0.02395300  | -4.64457800 |
| H | -0.07774900 | -1.22123400 | -4.46667700 |
| H | 0.61658000  | -2.13354400 | -2.25211000 |
| O | 3.94669200  | 1.48847300  | 1.00710900  |
| H | 4.14802500  | -0.53296000 | -1.44485900 |
| C | 3.69392500  | -1.87576600 | 0.18388400  |
| C | 4.98969900  | -2.67741800 | 0.00288300  |
| H | 4.84729600  | -3.71317500 | 0.32893200  |
| H | 5.81030000  | -2.25839600 | 0.60019200  |
| H | 5.31164700  | -2.69523700 | -1.04566100 |
| C | 3.21460800  | -1.87453900 | 1.64112200  |
| H | 3.09426400  | -2.90343200 | 1.99596800  |
| H | 2.24144800  | -1.38317200 | 1.73061700  |
| H | 3.92997300  | -1.37692000 | 2.30904000  |
| H | 2.90231900  | -2.34270100 | -0.41818500 |

**<sup>1</sup>TS2**

|    |             |             |             |
|----|-------------|-------------|-------------|
| C  | 3.86435700  | -1.45257700 | -0.20516100 |
| C  | 1.75075500  | -1.06844700 | -0.78821300 |
| H  | 4.65288500  | -1.67480700 | -0.92938000 |
| H  | 4.10802900  | -1.90730800 | 0.75639700  |
| N  | 2.10506000  | 0.13014900  | -0.54718500 |
| O  | 2.63849800  | -2.07739300 | -0.68327200 |
| C  | 0.36070800  | -1.44555100 | -1.11239600 |
| C  | -1.86661100 | -1.58956800 | -1.06345600 |
| C  | -1.29750600 | -2.45358900 | -2.21936300 |
| H  | -2.51312300 | -0.79927300 | -1.45273900 |
| H  | -1.56621600 | -3.50981800 | -2.16421000 |
| H  | -1.54768800 | -2.06373100 | -3.20966700 |
| N  | -0.65447600 | -0.94797300 | -0.51133600 |
| O  | 0.15233500  | -2.36050000 | -2.07105300 |
| Ni | -0.49993800 | 0.42430000  | 0.95456000  |
| C  | -4.00310100 | 1.63401700  | -1.79903700 |
| C  | -4.22376800 | 1.18712200  | -0.49228700 |
| C  | -3.15814800 | 1.12687700  | 0.41382200  |
| C  | -1.87000100 | 1.47640200  | -0.00694000 |
| C  | -1.66005900 | 1.99059100  | -1.29314100 |
| C  | -2.72517300 | 2.05175100  | -2.19375100 |
| H  | -4.83086000 | 1.69022800  | -2.50109500 |
| H  | -5.22238200 | 0.89528300  | -0.17660600 |
| H  | -3.32721200 | 0.78816900  | 1.43346800  |

|    |             |             |             |
|----|-------------|-------------|-------------|
| H  | -2.56702800 | 2.44657200  | -3.19551100 |
| C  | -0.26745200 | 2.51401300  | -1.54637800 |
| C  | 0.29654900  | 3.08448400  | -0.20986100 |
| C  | 0.06566200  | 1.95226000  | 2.06247200  |
| H  | -0.38852300 | 1.95884300  | 3.05198000  |
| H  | 1.14330500  | 1.81312100  | 2.05609600  |
| C  | -0.54919400 | 2.69211900  | 1.01297200  |
| H  | 1.31569800  | 2.71814900  | -0.06899800 |
| H  | 0.33398900  | 4.18067000  | -0.25221600 |
| H  | 0.38461200  | 1.69113500  | -1.86435100 |
| H  | -0.25917700 | 3.26465800  | -2.34433300 |
| C  | 3.50590500  | 0.05985800  | -0.09308100 |
| H  | 3.50333700  | 0.36093000  | 0.96253600  |
| C  | 4.40949400  | 1.03224500  | -0.87763900 |
| H  | 3.98741400  | 2.03177800  | -0.70142800 |
| C  | 5.84042900  | 1.01123800  | -0.32212900 |
| H  | 6.46231800  | 1.76293400  | -0.82087300 |
| H  | 5.85613600  | 1.21935900  | 0.75449200  |
| H  | 6.31686300  | 0.03533500  | -0.48239700 |
| C  | 4.38264400  | 0.77552500  | -2.39001200 |
| H  | 4.80923900  | -0.20288800 | -2.64455400 |
| H  | 3.35818000  | 0.80831500  | -2.77468900 |
| H  | 4.97149900  | 1.53418500  | -2.91774800 |
| C  | -2.63159700 | -2.35490200 | 0.03629100  |
| H  | -2.82380400 | -1.61153700 | 0.81984100  |
| C  | -1.81118400 | -3.48806600 | 0.66407500  |
| H  | -1.56097200 | -4.26901000 | -0.06599100 |
| H  | -0.88738600 | -3.10295400 | 1.10594900  |
| H  | -2.38819800 | -3.96621300 | 1.46349300  |
| C  | -3.98134800 | -2.83982300 | -0.50950400 |
| H  | -3.85002600 | -3.57521200 | -1.31468700 |
| H  | -4.56379600 | -3.32523600 | 0.28102900  |
| H  | -4.57300700 | -2.00541300 | -0.90575100 |
| C  | -1.62308900 | 3.69780500  | 1.41294800  |
| H  | -2.21339000 | 4.03917300  | 0.55860700  |
| H  | -2.29993100 | 3.28241400  | 2.16403300  |
| H  | -1.11260600 | 4.56529300  | 1.85482100  |
| Br | 0.62742000  | -1.06538100 | 2.43884700  |

**<sup>3</sup>TS2**

|   |             |            |             |
|---|-------------|------------|-------------|
| C | -3.98724400 | 0.65164000 | 0.93317900  |
| C | -2.24802800 | 0.88303100 | -0.42767900 |
| H | -4.95231700 | 1.16055100 | 0.88323900  |
| H | -3.73867800 | 0.40258500 | 1.96636700  |

|    |             |             |             |
|----|-------------|-------------|-------------|
| N  | -2.61866300 | -0.27386100 | -0.79648200 |
| O  | -2.97158200 | 1.58903300  | 0.46725100  |
| C  | -0.97369300 | 1.51488800  | -0.83479000 |
| C  | 1.20292800  | 1.97701600  | -0.99975300 |
| C  | 0.36372600  | 3.11171700  | -1.63556700 |
| H  | 1.91024300  | 1.55540400  | -1.71851100 |
| H  | 0.56303900  | 4.10281900  | -1.22648700 |
| H  | 0.43471700  | 3.14252600  | -2.72678600 |
| N  | 0.17249900  | 0.95353900  | -0.69534200 |
| O  | -1.01458200 | 2.76872000  | -1.29977700 |
| Ni | 0.46944200  | -0.79139400 | 0.39495000  |
| C  | 5.00554900  | 0.05768900  | 0.64640400  |
| C  | 4.20377900  | -0.49564500 | 1.64864000  |
| C  | 2.99712600  | -1.12155400 | 1.31154900  |
| C  | 2.56980800  | -1.14903500 | -0.02609000 |
| C  | 3.41901100  | -0.67416700 | -1.03283100 |
| C  | 4.62564800  | -0.05219900 | -0.69420400 |
| H  | 5.93978100  | 0.54874300  | 0.90591300  |
| H  | 4.51215900  | -0.43967200 | 2.68963800  |
| H  | 2.38132000  | -1.54159800 | 2.10589900  |
| H  | 5.28044200  | 0.32623100  | -1.47767200 |
| C  | 3.03196700  | -1.00727200 | -2.45737400 |
| C  | 1.61285500  | -1.59536000 | -2.45770100 |
| C  | -0.06242400 | -2.43487300 | -0.79354500 |
| H  | -0.39990700 | -3.24518900 | -0.14985400 |
| H  | -0.82757700 | -1.95625000 | -1.39890700 |
| C  | 1.30614900  | -2.39244400 | -1.19243600 |
| H  | 0.87321600  | -0.79230300 | -2.53289200 |
| H  | 1.46632200  | -2.25349700 | -3.32396700 |
| H  | 3.10230300  | -0.14059700 | -3.12778900 |
| H  | 3.74958300  | -1.74389000 | -2.84566900 |
| C  | -3.84341600 | -0.56964000 | -0.02218900 |
| H  | -3.63620300 | -1.47385800 | 0.56143700  |
| C  | -5.04245400 | -0.84656900 | -0.95356700 |
| H  | -4.73037900 | -1.68250400 | -1.59455200 |
| C  | -6.26666100 | -1.29433800 | -0.14238500 |
| H  | -7.09337200 | -1.56909900 | -0.80710500 |
| H  | -6.03538600 | -2.16232400 | 0.48664600  |
| H  | -6.62834300 | -0.49187000 | 0.51347800  |
| C  | -5.37150700 | 0.34474800  | -1.86319500 |
| H  | -5.70528200 | 1.21626000  | -1.28605800 |
| H  | -4.49808300 | 0.64280800  | -2.45210600 |
| H  | -6.17829700 | 0.08533700  | -2.55798500 |
| C  | 1.97637200  | 2.36729000  | 0.28048700  |

|    |             |             |             |
|----|-------------|-------------|-------------|
| H  | 2.43157800  | 1.44157400  | 0.64475200  |
| C  | 1.06143800  | 2.90583600  | 1.38857200  |
| H  | 0.53340500  | 3.81854800  | 1.08298300  |
| H  | 0.32239600  | 2.15779000  | 1.69339700  |
| H  | 1.65874700  | 3.15527600  | 2.27228900  |
| C  | 3.11244700  | 3.33945900  | -0.06394800 |
| H  | 2.73322700  | 4.30591900  | -0.42158800 |
| H  | 3.72070900  | 3.53680800  | 0.82493300  |
| H  | 3.77310600  | 2.92244100  | -0.83315900 |
| C  | 2.13154500  | -3.64846100 | -0.94906300 |
| H  | 3.20181400  | -3.49727700 | -1.11133900 |
| H  | 1.98664900  | -4.01152000 | 0.07244800  |
| H  | 1.77892000  | -4.42893200 | -1.63777900 |
| Br | -0.77175100 | -0.56521500 | 2.41703100  |

**<sup>2</sup>TS3**

|    |             |             |             |
|----|-------------|-------------|-------------|
| C  | 3.90775900  | 1.38267800  | -1.10040400 |
| C  | 1.90786700  | 1.52306100  | -0.14636200 |
| H  | 4.93501800  | 1.49472000  | -0.74992600 |
| H  | 3.83822300  | 1.73671400  | -2.13699200 |
| N  | 1.93347500  | 0.25127700  | -0.57054200 |
| O  | 3.06949100  | 2.22061500  | -0.27265800 |
| C  | 0.70950500  | 2.00570500  | 0.38297300  |
| C  | -1.48737500 | 1.93617300  | 0.86369800  |
| C  | -0.82567200 | 3.21195200  | 1.44203300  |
| H  | -2.04540800 | 1.40544800  | 1.64476200  |
| H  | -1.35663400 | 4.13892600  | 1.21719000  |
| H  | -0.67050400 | 3.13626200  | 2.52605800  |
| N  | -0.31033700 | 1.14993800  | 0.47401800  |
| O  | 0.47053300  | 3.27989700  | 0.79858700  |
| Ni | 0.25051100  | -0.64551900 | -0.18843200 |
| C  | -4.37608500 | -0.95346600 | -0.73469600 |
| C  | -3.51086100 | -0.97048200 | -1.83320900 |
| C  | -2.13783300 | -1.15915800 | -1.64054500 |
| C  | -1.63147800 | -1.30396300 | -0.34328200 |
| C  | -2.50697000 | -1.33565000 | 0.75028200  |
| C  | -3.87483000 | -1.14419400 | 0.55970200  |
| H  | -5.44325800 | -0.81470000 | -0.88581500 |
| H  | -3.90493900 | -0.83790200 | -2.83771600 |
| H  | -1.46623200 | -1.18412900 | -2.49560800 |
| H  | -4.55331000 | -1.16980400 | 1.40991100  |
| C  | -1.82633800 | -1.70199600 | 2.04538000  |
| C  | -0.80518300 | -2.82172500 | 1.70167200  |
| C  | 0.98584300  | -2.46123000 | -0.08615300 |



|   |             |             |             |
|---|-------------|-------------|-------------|
| H | 1.41538700  | -2.83380200 | -1.01711500 |
| H | 1.68885900  | -2.38617900 | 0.74026500  |
| C | -0.37426000 | -2.78368600 | 0.21701900  |
| H | 0.07809700  | -2.74221800 | 2.34255600  |
| H | -1.25818700 | -3.80257000 | 1.89301800  |
| H | -1.28513100 | -0.82666600 | 2.42848000  |
| H | -2.53296100 | -2.02079400 | 2.81917900  |
| C | 3.32268000  | -0.04629700 | -0.94583200 |
| H | 3.33979100  | -0.56570700 | -1.91229400 |
| C | 4.07999700  | -0.93127900 | 0.07822200  |
| H | 3.55891200  | -1.89425800 | 0.08732600  |
| C | 5.52017900  | -1.20606400 | -0.38152400 |
| H | 5.99762100  | -1.94546100 | 0.27155200  |
| H | 5.54730100  | -1.59723500 | -1.40655800 |
| H | 6.13947500  | -0.30122800 | -0.35160200 |
| C | 4.03504000  | -0.35564900 | 1.49892400  |
| H | 2.99987900  | -0.22504300 | 1.83100400  |
| H | 4.54200000  | -1.02501800 | 2.20383900  |
| H | 4.52871700  | 0.62212700  | 1.55201700  |
| C | -2.45685500 | 2.19699700  | -0.31332900 |
| H | -2.74061600 | 1.21055600  | -0.68284300 |
| C | -1.79911700 | 2.95372400  | -1.47417000 |
| H | -1.48565500 | 3.96373700  | -1.18315600 |
| H | -0.91604300 | 2.41731900  | -1.83633800 |
| H | -2.50221000 | 3.05204000  | -2.30975400 |
| C | -3.73630400 | 2.89200400  | 0.17199600  |
| H | -3.53880900 | 3.90591100  | 0.54408400  |
| H | -4.45965400 | 2.98098900  | -0.64675700 |
| H | -4.21473400 | 2.32282500  | 0.97885500  |
| C | -1.02359800 | -3.85236900 | -0.65896000 |
| H | -2.10827000 | -3.89306600 | -0.53047900 |
| H | -0.80250200 | -3.68789900 | -1.71682000 |
| H | -0.59733800 | -4.82248200 | -0.36658500 |

**<sup>2</sup>TS4**

|   |             |             |             |
|---|-------------|-------------|-------------|
| C | -0.59766400 | 3.11116000  | 1.21998000  |
| C | -0.98143300 | 2.37654000  | -0.09544600 |
| C | 0.13199200  | 1.01254800  | 1.25822200  |
| H | 0.17326200  | 3.87459900  | 1.10782400  |
| H | -1.46274300 | 3.50911800  | 1.75110600  |
| H | -2.05450000 | 2.18576400  | -0.11364300 |
| N | -0.32245700 | 1.06662300  | 0.05395100  |
| O | -0.01477200 | 2.06067300  | 2.06544900  |
| C | 0.75343500  | -0.24145600 | 1.68985100  |

|   |             |             |             |
|---|-------------|-------------|-------------|
| C | 1.43783100  | -2.35013000 | 1.46523900  |
| C | 1.98788600  | -1.73686700 | 2.78558000  |
| H | 2.24068300  | -2.46300000 | 0.72765400  |
| H | 1.56675100  | -2.18899000 | 3.68719900  |
| H | 3.07694500  | -1.73708400 | 2.85259200  |
| N | 0.56374600  | -1.28183600 | 0.95741100  |
| O | 1.55567400  | -0.33654100 | 2.75689500  |
| C | 0.71488300  | -3.70430600 | 1.56713000  |
| H | 0.31392100  | -3.87578700 | 0.55973900  |
| C | -0.45480400 | -3.69881400 | 2.55814500  |
| H | -1.02539000 | -4.62992200 | 2.47205000  |
| H | -0.11165300 | -3.62562200 | 3.59808300  |
| H | -1.13750600 | -2.86828700 | 2.36456000  |
| C | 1.72104900  | -4.81775800 | 1.88967200  |
| H | 1.22675800  | -5.79514000 | 1.89850500  |
| H | 2.52840300  | -4.85610000 | 1.14856200  |
| H | 2.17452500  | -4.67130400 | 2.87976400  |
| C | -0.62061000 | 3.07058500  | -1.41962600 |
| H | -0.98032900 | 2.39053000  | -2.20465600 |
| C | -1.38958700 | 4.39392400  | -1.53991600 |
| H | -1.05886600 | 5.11364800  | -0.77932700 |
| H | -1.22293000 | 4.85347700  | -2.52051700 |
| H | -2.46698500 | 4.23748200  | -1.41290100 |
| C | 0.88618100  | 3.26413300  | -1.61980300 |
| H | 1.08730300  | 3.66828500  | -2.61863800 |
| H | 1.30118100  | 3.96333700  | -0.88517500 |
| H | 1.41192300  | 2.31045800  | -1.51857600 |
| C | 3.45674500  | -0.00439900 | -0.62677500 |
| H | 2.36649200  | -0.00315100 | -0.69741200 |
| H | 3.72207300  | -0.56633200 | 0.27866400  |
| C | 3.94009100  | 1.42827300  | -0.48309600 |
| H | 3.79541100  | 1.97264900  | -1.42497200 |
| H | 5.00565700  | 1.46484000  | -0.22417700 |
| C | 4.03962300  | -0.68628600 | -1.87392200 |
| H | 3.70407800  | -0.14384600 | -2.76847400 |
| H | 5.14295600  | -0.59418300 | -1.85785500 |
| C | 3.66099800  | -2.13268900 | -2.00124400 |
| H | 3.88471000  | -2.62260800 | -2.94474500 |
| H | 3.81169200  | -2.76284800 | -1.12664200 |
| O | 3.15038600  | 2.05079800  | 0.55157400  |
| C | 3.32113500  | 3.35760000  | 0.87461100  |
| O | 2.50737600  | 3.89409900  | 1.59176400  |
| C | 4.53300800  | 4.07738600  | 0.31583500  |
| H | 5.46230700  | 3.56957300  | 0.59558300  |

|    |             |             |             |
|----|-------------|-------------|-------------|
| H  | 4.49546900  | 4.11731300  | -0.77847400 |
| H  | 4.53790900  | 5.09250700  | 0.71276400  |
| Br | 1.18854800  | -2.21176900 | -2.13558700 |
| Ni | -0.43608600 | -0.87860100 | -0.85451600 |
| C  | -2.22402900 | -1.40657600 | -1.60632000 |
| C  | -3.52457100 | -1.33250500 | -0.77455400 |
| C  | -3.84786500 | 0.08586300  | -0.31902500 |
| C  | -4.35951300 | 1.14180600  | -1.07376300 |
| C  | -4.65026900 | 2.36134600  | -0.44770300 |
| C  | -4.42241700 | 2.52584200  | 0.92370300  |
| C  | -3.88870300 | 1.47315600  | 1.67866000  |
| C  | -3.60630400 | 0.26049300  | 1.05131300  |
| C  | -3.02450900 | -1.00123600 | 1.64333500  |
| H  | -1.93740100 | -0.89344400 | 1.73502100  |
| H  | -3.41274500 | -1.22982600 | 2.64297700  |
| C  | -3.37636100 | -2.07884400 | 0.59037200  |
| H  | -2.62335000 | -2.86972600 | 0.52472900  |
| H  | -4.33116000 | -2.54630500 | 0.86343900  |
| H  | -3.70767300 | 1.59825900  | 2.74417300  |
| H  | -4.66289100 | 3.47119700  | 1.40371700  |
| H  | -5.06658700 | 3.18110300  | -1.02814900 |
| H  | -4.54966300 | 1.01564900  | -2.13673200 |
| C  | -4.69583800 | -1.92481700 | -1.58927300 |
| H  | -4.80515700 | -1.41043000 | -2.55136000 |
| H  | -4.50821700 | -2.98425300 | -1.80169400 |
| H  | -5.64857700 | -1.84482800 | -1.04890600 |
| H  | -2.12101200 | -2.43011300 | -1.99352100 |
| H  | -2.32447300 | -0.75346200 | -2.49227500 |

**<sup>2</sup>TS5**

|   |             |            |            |
|---|-------------|------------|------------|
| C | -1.24698200 | 3.42800100 | 1.62705700 |
| H | -1.14449900 | 3.99915000 | 2.54943800 |
| H | -1.47293500 | 4.09287400 | 0.79034600 |
| O | -2.40212300 | 2.52951400 | 1.79245200 |
| C | -2.00141800 | 1.37558900 | 1.25754800 |
| N | -0.77341700 | 1.24788000 | 0.88760000 |
| C | -0.06776100 | 2.47860000 | 1.31064700 |
| H | 0.50456600  | 2.85200700 | 0.46637200 |
| C | 0.89913400  | 2.18705000 | 2.48112000 |
| C | 1.89179400  | 3.34811200 | 2.63367500 |
| H | 1.37374000  | 4.28171000 | 2.89143400 |
| H | 2.61164700  | 3.13961400 | 3.43239500 |
| H | 2.44811100  | 3.51770300 | 1.70546800 |
| C | 0.18348700  | 1.88823600 | 3.80650700 |

|    |             |             |             |
|----|-------------|-------------|-------------|
| H  | 0.89665200  | 1.49929900  | 4.54112800  |
| H  | -0.26548600 | 2.79130400  | 4.23738800  |
| H  | -0.61039400 | 1.14325900  | 3.69025200  |
| H  | 1.45718900  | 1.29112500  | 2.18288900  |
| Ni | -0.31700600 | -0.52218000 | 0.06682300  |
| C  | 1.38103900  | 0.09255700  | -0.68269600 |
| C  | 1.33588900  | 0.80660200  | -2.07079300 |
| C  | 1.11331400  | 2.30008700  | -1.88959600 |
| C  | 2.03058300  | 3.26437800  | -1.47064600 |
| C  | 1.60426300  | 4.58781200  | -1.30099600 |
| C  | 0.27174000  | 4.93837800  | -1.54934600 |
| C  | -0.64457300 | 3.97139400  | -1.98392300 |
| C  | -0.21605500 | 2.65598000  | -2.15883500 |
| C  | -0.99974200 | 1.44145500  | -2.60267900 |
| H  | -1.60929400 | 1.06459700  | -1.76969600 |
| H  | -1.68363700 | 1.64707300  | -3.43434900 |
| C  | 0.11154300  | 0.42881100  | -2.96302800 |
| H  | -0.18793100 | -0.61136700 | -2.82770600 |
| H  | 0.39165600  | 0.57208300  | -4.01466000 |
| H  | -1.67528700 | 4.24949600  | -2.19541400 |
| H  | -0.04863600 | 5.96952000  | -1.42238800 |
| H  | 2.31215600  | 5.34784800  | -0.98036100 |
| H  | 3.06366600  | 2.98941500  | -1.27239900 |
| C  | 2.66074500  | 0.48854000  | -2.79450800 |
| H  | 3.53121800  | 0.67335600  | -2.15527800 |
| H  | 2.68160300  | -0.57182600 | -3.07105600 |
| H  | 2.76334100  | 1.08555700  | -3.70922400 |
| H  | 1.99829700  | -0.79811200 | -0.78204200 |
| H  | 1.85610700  | 0.75175900  | 0.05505600  |
| N  | -2.35842300 | -0.81987100 | 0.53774600  |
| C  | -2.87981800 | 0.21917200  | 1.07770100  |
| O  | -4.16108600 | 0.19262200  | 1.45913800  |
| C  | -4.58152400 | -1.19699400 | 1.22713600  |
| H  | -5.54020200 | -1.16213100 | 0.70880700  |
| H  | -4.70999100 | -1.66002000 | 2.20935900  |
| C  | -3.42445600 | -1.82579600 | 0.39556400  |
| H  | -3.06772000 | -2.75777300 | 0.84487500  |
| C  | -3.74589400 | -2.09832300 | -1.09223200 |
| C  | -4.74211700 | -3.25969800 | -1.21153200 |
| H  | -4.91640200 | -3.50471600 | -2.26464700 |
| H  | -4.36509800 | -4.16214800 | -0.71598500 |
| H  | -5.71676000 | -3.01100900 | -0.76973900 |
| C  | -4.23752300 | -0.85114900 | -1.83690100 |
| H  | -4.37337400 | -1.07980400 | -2.89935000 |

|    |             |             |             |
|----|-------------|-------------|-------------|
| H  | -3.51453800 | -0.03282800 | -1.76790100 |
| H  | -5.20219100 | -0.49120500 | -1.45564500 |
| H  | -2.79247500 | -2.40890100 | -1.53232600 |
| C  | 2.50136100  | -1.84225800 | 2.02965000  |
| H  | 2.32419900  | -1.30813100 | 1.09667900  |
| H  | 2.75303700  | -1.08166100 | 2.78104200  |
| C  | 3.70074100  | -2.76182900 | 1.81769000  |
| H  | 3.41698900  | -3.64920900 | 1.24083100  |
| H  | 4.13240300  | -3.10363100 | 2.76294300  |
| C  | 1.20151600  | -2.56436300 | 2.39742000  |
| H  | 1.01477700  | -3.36715200 | 1.67462300  |
| H  | 1.30548400  | -3.04692100 | 3.38802200  |
| C  | 0.03206000  | -1.62949800 | 2.39298000  |
| H  | -0.96642100 | -2.05477900 | 2.36686400  |
| H  | 0.12902200  | -0.68659100 | 2.92135600  |
| O  | 4.75629200  | -2.03194700 | 1.16480200  |
| C  | 4.72799700  | -1.83058000 | -0.18406400 |
| O  | 5.37399800  | -0.91724600 | -0.64466700 |
| C  | 3.94487100  | -2.80991200 | -1.03999200 |
| H  | 4.29527800  | -3.83440900 | -0.86744300 |
| H  | 2.86726600  | -2.79049500 | -0.84184000 |
| H  | 4.11137700  | -2.54230900 | -2.08360800 |
| Br | -0.08398300 | -2.66235200 | -0.95612400 |

**<sup>2</sup>TS6**

|    |             |             |             |
|----|-------------|-------------|-------------|
| C  | -4.29538200 | -0.27186800 | -2.62763900 |
| H  | -4.19097600 | -0.59862800 | -3.66455300 |
| H  | -5.35518000 | -0.13370400 | -2.39813200 |
| O  | -3.64590500 | 1.02778900  | -2.50803300 |
| C  | -2.76053900 | 0.88866900  | -1.49571500 |
| N  | -2.63781500 | -0.23733600 | -0.91359000 |
| C  | -3.55089600 | -1.17085600 | -1.59536800 |
| H  | -4.24755700 | -1.56050000 | -0.84498100 |
| C  | -2.77106700 | -2.37321800 | -2.17491700 |
| C  | -3.74214800 | -3.42949300 | -2.71946500 |
| H  | -4.32638600 | -3.04247600 | -3.56477000 |
| H  | -3.19514900 | -4.30860600 | -3.07689400 |
| H  | -4.44517500 | -3.76205900 | -1.94624500 |
| C  | -1.73624900 | -1.96009800 | -3.23028500 |
| H  | -1.12790100 | -2.82330200 | -3.52138000 |
| H  | -2.21301600 | -1.57791300 | -4.14156900 |
| H  | -1.05891700 | -1.18762500 | -2.85332400 |
| H  | -2.23813100 | -2.80804000 | -1.31920900 |
| Ni | 0.32987100  | 0.57349300  | 0.26008100  |

|   |             |             |             |
|---|-------------|-------------|-------------|
| C | 1.02081200  | -0.64291600 | 1.75909700  |
| C | 0.01949000  | -0.99937200 | 2.88378000  |
| C | -0.94934700 | -2.11055400 | 2.49525000  |
| C | -0.69703900 | -3.47724800 | 2.37252200  |
| C | -1.71913500 | -4.32628600 | 1.93505700  |
| C | -2.98583700 | -3.81134900 | 1.63593900  |
| C | -3.24177100 | -2.44333400 | 1.77710100  |
| C | -2.21954100 | -1.59817700 | 2.20584600  |
| C | -2.24700500 | -0.10022800 | 2.39097500  |
| H | -2.22083500 | 0.38306000  | 1.40717500  |
| H | -3.15085000 | 0.25631700  | 2.89896100  |
| C | -0.95807600 | 0.17739500  | 3.19676900  |
| H | -0.51123000 | 1.15040900  | 2.96787500  |
| H | -1.19136600 | 0.16943800  | 4.26788700  |
| H | -4.23153200 | -2.04454400 | 1.56598000  |
| H | -3.77723100 | -4.48004700 | 1.30675600  |
| H | -1.53101900 | -5.39196500 | 1.83511600  |
| H | 0.28519600  | -3.88143700 | 2.60591000  |
| C | 0.85776900  | -1.36353600 | 4.12774000  |
| H | 1.52667400  | -2.20805600 | 3.92666000  |
| H | 1.47774600  | -0.51403600 | 4.43753300  |
| H | 0.20523200  | -1.63842900 | 4.96448800  |
| H | 1.54760600  | 0.28963400  | 2.01026000  |
| H | 1.79066500  | -1.40485300 | 1.66397900  |
| N | -0.89981200 | 2.08023800  | -0.43070100 |
| C | -1.98289600 | 2.08784000  | -1.12215400 |
| O | -2.47233900 | 3.26423300  | -1.53459900 |
| C | -1.52354400 | 4.27963000  | -1.08516900 |
| H | -2.08779300 | 5.02530300  | -0.52137200 |
| H | -1.09796600 | 4.74364600  | -1.97813400 |
| C | -0.48519200 | 3.49545600  | -0.24719200 |
| H | 0.51944900  | 3.58005900  | -0.66590800 |
| C | -0.40235700 | 3.84905900  | 1.25119400  |
| C | 0.20304200  | 5.24731000  | 1.42987400  |
| H | 0.32393700  | 5.48064900  | 2.49329800  |
| H | 1.18789300  | 5.31219000  | 0.95444900  |
| H | -0.44116500 | 6.02422100  | 0.99627000  |
| C | -1.74318000 | 3.70675900  | 1.98150900  |
| H | -1.60730400 | 3.85942900  | 3.05773800  |
| H | -2.17621200 | 2.71201100  | 1.83831000  |
| H | -2.47536900 | 4.44954800  | 1.63950100  |
| H | 0.30599400  | 3.12031000  | 1.66777000  |
| C | 2.88911000  | -1.78803700 | -0.76759300 |
| H | 3.19036600  | -1.00082700 | -0.07086100 |

|    |             |             |             |
|----|-------------|-------------|-------------|
| H  | 2.89788300  | -2.74190400 | -0.22363700 |
| C  | 3.91160500  | -1.85866200 | -1.89634500 |
| H  | 3.96406500  | -0.90132000 | -2.42627700 |
| H  | 3.63853300  | -2.63043700 | -2.62418800 |
| C  | 1.48432300  | -1.47745600 | -1.29113400 |
| H  | 1.51862000  | -0.55881500 | -1.88730700 |
| H  | 1.16345600  | -2.28430700 | -1.97287100 |
| C  | 0.42294400  | -1.37915100 | -0.20206400 |
| H  | -0.58746300 | -1.16969600 | -0.58153600 |
| H  | 0.34940800  | -2.30185600 | 0.36278900  |
| O  | 5.19699100  | -2.26042600 | -1.39944400 |
| C  | 6.10756700  | -1.36395600 | -0.92055700 |
| O  | 7.08812900  | -1.79513000 | -0.36070900 |
| C  | 5.86509800  | 0.11353400  | -1.16008600 |
| H  | 5.85174800  | 0.33172500  | -2.23477800 |
| H  | 4.91503800  | 0.46755900  | -0.74571900 |
| H  | 6.68745400  | 0.66113900  | -0.69882400 |
| Br | 2.44878300  | 1.79113500  | -0.27994300 |

**<sup>2</sup>TS7**

|    |             |             |             |
|----|-------------|-------------|-------------|
| C  | -0.99415600 | -2.95883400 | 2.36937800  |
| H  | -1.61470800 | -2.96334400 | 3.26943000  |
| H  | -0.88704200 | -3.97563100 | 1.98838700  |
| O  | 0.34167000  | -2.49841700 | 2.76216200  |
| C  | 0.51226900  | -1.34313900 | 2.10308000  |
| N  | -0.39914300 | -0.91043400 | 1.31606100  |
| C  | -1.45787300 | -1.93872500 | 1.28960500  |
| H  | -1.40277700 | -2.39621300 | 0.29771500  |
| C  | -2.87055700 | -1.35758800 | 1.46297200  |
| C  | -3.92250200 | -2.46587100 | 1.31738100  |
| H  | -3.86619500 | -3.18120600 | 2.14902900  |
| H  | -4.92514100 | -2.03049500 | 1.30928300  |
| H  | -3.78364100 | -3.02460600 | 0.38303200  |
| C  | -3.05843300 | -0.55928800 | 2.75740100  |
| H  | -4.03501600 | -0.06540600 | 2.74577100  |
| H  | -3.01998900 | -1.20559100 | 3.64376500  |
| H  | -2.28454400 | 0.20876700  | 2.86246500  |
| H  | -2.99454700 | -0.66526400 | 0.62208800  |
| Ni | 0.52802200  | 0.63417700  | -0.14272000 |
| C  | -0.83439700 | 0.43652600  | -1.61711200 |
| C  | -0.43613800 | -0.41282700 | -2.85745200 |
| C  | -0.08577900 | -1.82259000 | -2.40043200 |
| C  | -0.94698500 | -2.86767900 | -2.06951300 |
| C  | -0.41777500 | -4.07706400 | -1.59750800 |

|   |             |             |             |
|---|-------------|-------------|-------------|
| C | 0.96444700  | -4.23581300 | -1.45918900 |
| C | 1.83176600  | -3.19405600 | -1.81431000 |
| C | 1.30262500  | -1.99595300 | -2.29086900 |
| C | 2.02510100  | -0.74434100 | -2.74060500 |
| H | 2.40456900  | -0.18680500 | -1.87473000 |
| H | 2.89064100  | -0.95896100 | -3.37951700 |
| C | 0.92060500  | 0.06339600  | -3.46438500 |
| H | 1.05314300  | 1.14305600  | -3.34941600 |
| H | 0.94650300  | -0.17276100 | -4.53638800 |
| H | 2.90832500  | -3.32963400 | -1.73634100 |
| H | 1.36895400  | -5.17835200 | -1.09874700 |
| H | -1.08509300 | -4.89838000 | -1.34594400 |
| H | -2.02295900 | -2.74757900 | -2.17679600 |
| C | -1.55259400 | -0.40158100 | -3.91747800 |
| H | -2.50323800 | -0.74708900 | -3.49157400 |
| H | -1.71054800 | 0.61957600  | -4.28580000 |
| H | -1.31358000 | -1.04240700 | -4.77707100 |
| H | -1.14367400 | 1.43106600  | -1.98503400 |
| H | -1.73700000 | -0.03425500 | -1.18953600 |
| N | 2.03308700  | 0.29720700  | 1.31421700  |
| C | 1.78223800  | -0.61100100 | 2.18616600  |
| O | 2.69928300  | -0.89252500 | 3.11903000  |
| C | 3.76505200  | 0.09017400  | 2.90956600  |
| H | 4.71156300  | -0.45204000 | 2.90807300  |
| H | 3.73995100  | 0.77985600  | 3.75797800  |
| C | 3.41053300  | 0.76780800  | 1.55618600  |
| H | 3.38910800  | 1.85820100  | 1.64335200  |
| C | 4.32834800  | 0.39745000  | 0.36906100  |
| C | 5.72707000  | 0.99658300  | 0.56777400  |
| H | 6.35321100  | 0.80235200  | -0.30961600 |
| H | 5.67950700  | 2.08239100  | 0.71272500  |
| H | 6.23900300  | 0.55953500  | 1.43545100  |
| C | 4.38336600  | -1.11313900 | 0.10914000  |
| H | 4.97537400  | -1.31751600 | -0.78965200 |
| H | 3.38476800  | -1.52970500 | -0.05342900 |
| H | 4.85228200  | -1.65714100 | 0.93926700  |
| H | 3.87211400  | 0.88035900  | -0.50211700 |
| C | -2.34897900 | 2.51311800  | 0.79296700  |
| H | -2.10588800 | 1.48206700  | 0.51728500  |
| H | -2.42955300 | 2.54654400  | 1.88617000  |
| C | -3.70058300 | 2.89449500  | 0.20161600  |
| H | -3.67907500 | 2.84984500  | -0.89173200 |
| H | -3.98243400 | 3.91253100  | 0.48941200  |
| C | -1.22087100 | 3.43041300  | 0.30859300  |



|    |             |             |             |
|----|-------------|-------------|-------------|
| H  | -1.17339100 | 3.40308300  | -0.78602800 |
| H  | -1.43295700 | 4.47531900  | 0.57897200  |
| C  | 0.11878600  | 3.03775900  | 0.88923200  |
| H  | 0.72585500  | 3.84305000  | 1.28667400  |
| H  | 0.12740800  | 2.17352300  | 1.55215000  |
| O  | -4.72942000 | 2.05103500  | 0.74946600  |
| C  | -5.16430400 | 0.92299400  | 0.13297800  |
| O  | -5.86413900 | 0.16261200  | 0.76517300  |
| C  | -4.78271200 | 0.68844100  | -1.31590600 |
| H  | -5.16204500 | 1.49364700  | -1.95549300 |
| H  | -3.69771500 | 0.63613500  | -1.45566700 |
| H  | -5.22991300 | -0.25591000 | -1.62727000 |
| Br | 1.71810300  | 2.79861100  | -0.84665800 |

**<sup>1</sup>TS8**

|    |             |             |             |
|----|-------------|-------------|-------------|
| C  | 3.92498900  | 2.06417300  | -1.13710000 |
| C  | 3.39625200  | 0.69216700  | -1.64092800 |
| C  | 1.80528400  | 1.73724800  | -0.53409600 |
| H  | 4.82000300  | 2.00470600  | -0.51514000 |
| H  | 4.09169200  | 2.78279500  | -1.94563900 |
| H  | 3.49498600  | 0.61240400  | -2.72957600 |
| N  | 1.96266300  | 0.72404500  | -1.29323900 |
| O  | 2.84488800  | 2.57299100  | -0.30673800 |
| C  | 0.55992500  | 2.03018600  | 0.19910600  |
| C  | -1.44239500 | 1.84768100  | 1.16640900  |
| C  | -0.72029300 | 3.12368200  | 1.65978500  |
| H  | -1.65605900 | 1.17589900  | 2.00117400  |
| H  | -1.29385400 | 4.04453900  | 1.54824500  |
| H  | -0.35629600 | 3.03100900  | 2.68654300  |
| N  | -0.39236700 | 1.18827200  | 0.35478700  |
| O  | 0.45301000  | 3.22880400  | 0.79484900  |
| Ni | -0.26308000 | -0.81606500 | 0.18066200  |
| C  | -4.01758700 | -0.36115700 | -2.45126900 |
| C  | -2.87244100 | 0.30744200  | -2.89884000 |
| C  | -1.63891200 | 0.04454800  | -2.30429400 |
| C  | -1.55298500 | -0.87776000 | -1.25587300 |
| C  | -2.68837700 | -1.59070500 | -0.81906100 |
| C  | -3.92017900 | -1.30249600 | -1.42333000 |
| H  | -4.98176300 | -0.15943300 | -2.91034000 |
| H  | -2.94434500 | 1.03623700  | -3.70242600 |
| H  | -0.73837800 | 0.55756700  | -2.62935200 |
| H  | -4.81225800 | -1.82572400 | -1.08408300 |
| C  | -2.57041000 | -2.60293900 | 0.30580800  |
| C  | -1.32601100 | -3.52717000 | 0.21571100  |

|    |             |             |             |
|----|-------------|-------------|-------------|
| C  | -0.02716400 | -2.79881900 | -0.10971100 |
| C  | 1.23879500  | -3.36258400 | 0.49787900  |
| C  | 0.03929000  | -2.17049700 | -1.39151900 |
| Br | 0.35399400  | -0.86477900 | 2.48934500  |
| H  | 1.43086000  | -4.36258400 | 0.07703200  |
| H  | 2.10285700  | -2.73035200 | 0.27609200  |
| H  | 1.15559700  | -3.45105200 | 1.58249300  |
| H  | -1.21836900 | -4.04504700 | 1.17429800  |
| H  | -1.50910900 | -4.30031200 | -0.54650700 |
| H  | -2.50668800 | -2.06751000 | 1.26222700  |
| H  | -3.47720800 | -3.21886800 | 0.34664500  |
| C  | -2.73292600 | 2.08113900  | 0.35160300  |
| H  | -3.00648700 | 1.10629500  | -0.06547600 |
| C  | -2.53936300 | 3.05819100  | -0.81512100 |
| H  | -2.34369100 | 4.07988900  | -0.46588800 |
| H  | -1.71204800 | 2.74907700  | -1.46016600 |
| H  | -3.44293900 | 3.08752900  | -1.43304700 |
| C  | -3.86547000 | 2.53678800  | 1.28273400  |
| H  | -4.80086700 | 2.64553100  | 0.72284400  |
| H  | -4.03571300 | 1.81308100  | 2.08866800  |
| H  | -3.64510800 | 3.50884400  | 1.74385000  |
| C  | 4.06383000  | -0.55055500 | -1.00045400 |
| H  | 3.50238800  | -1.41445300 | -1.38348200 |
| C  | 5.51948100  | -0.68252400 | -1.47098000 |
| H  | 5.59149700  | -0.70395100 | -2.56547600 |
| H  | 6.13604100  | 0.15037900  | -1.10912600 |
| H  | 5.96487900  | -1.60597600 | -1.08535700 |
| C  | 3.95771900  | -0.56187300 | 0.53124100  |
| H  | 2.91935900  | -0.52257000 | 0.87587800  |
| H  | 4.40201800  | -1.48011300 | 0.93135800  |
| H  | 4.49884700  | 0.28066100  | 0.98042700  |
| H  | -0.55908100 | -2.53413700 | -2.21981500 |
| H  | 0.98411100  | -1.73285400 | -1.71438600 |

**<sup>2</sup>TS9**

|   |             |             |             |
|---|-------------|-------------|-------------|
| C | -2.43930000 | -2.48209400 | -1.45866000 |
| C | -2.53477900 | -1.27232700 | -0.49579500 |
| C | -0.43589000 | -2.07073000 | -0.58983200 |
| H | -3.19464700 | -3.25427300 | -1.29795300 |
| H | -2.46375700 | -2.16439300 | -2.50862500 |
| H | -3.00587900 | -0.42134300 | -1.00013400 |
| N | -1.12446700 | -0.98307800 | -0.24173900 |
| O | -1.14297800 | -3.06907000 | -1.18810800 |
| C | 0.92307200  | -2.08845800 | -0.27876300 |

|    |             |             |             |
|----|-------------|-------------|-------------|
| C  | 2.88235100  | -1.18599400 | 0.37025900  |
| C  | 3.04742300  | -2.68422000 | 0.00805000  |
| H  | 3.28955300  | -1.01043800 | 1.37182900  |
| H  | 3.86461900  | -2.89443800 | -0.68553400 |
| H  | 3.16833600  | -3.30539600 | 0.90439700  |
| N  | 1.42387900  | -1.03139800 | 0.38115800  |
| O  | 1.81117200  | -3.05250400 | -0.64163500 |
| Ni | 0.07560200  | 0.38253400  | 0.56229200  |
| C  | -2.45773700 | 3.58013400  | -1.68411200 |
| C  | -3.16318800 | 2.72806700  | -0.82947700 |
| C  | -2.46904200 | 1.90507700  | 0.05554700  |
| C  | -1.06667700 | 1.89824500  | 0.07895500  |
| C  | -0.34830100 | 2.79963400  | -0.74028700 |
| C  | -1.06320500 | 3.61594100  | -1.62596800 |
| H  | -2.98976900 | 4.22806300  | -2.37545100 |
| H  | -4.25025000 | 2.70937500  | -0.84733000 |
| H  | -3.01539800 | 1.26651000  | 0.74072100  |
| H  | -0.51458800 | 4.29356900  | -2.27746400 |
| C  | 1.16441300  | 2.87336900  | -0.67210100 |
| C  | 1.72530600  | 2.83545900  | 0.77119000  |
| C  | 1.11913900  | 1.72540800  | 1.62434500  |
| C  | 2.01763600  | 1.10178400  | 2.67150600  |
| C  | -0.27508300 | 1.89733700  | 1.93529300  |
| H  | 2.99145700  | 0.83415700  | 2.25282400  |
| H  | 2.20439100  | 1.81146500  | 3.49248200  |
| H  | 1.56939400  | 0.19863200  | 3.09819900  |
| C  | 3.57232500  | -0.20151800 | -0.60386200 |
| H  | 3.27556100  | 0.79639900  | -0.25968500 |
| C  | 3.08202600  | -0.36030500 | -2.04872200 |
| H  | 3.53062000  | 0.40422900  | -2.69377600 |
| H  | 3.34975000  | -1.34078300 | -2.46079600 |
| H  | 1.99338200  | -0.25851700 | -2.10379800 |
| C  | 5.10124100  | -0.29621700 | -0.50549500 |
| H  | 5.57886900  | 0.47628500  | -1.11889800 |
| H  | 5.44609800  | -0.16591800 | 0.52822200  |
| H  | 5.46989200  | -1.26681200 | -0.86090600 |
| C  | -3.31379700 | -1.55278400 | 0.81560100  |
| H  | -3.14711000 | -0.67193300 | 1.45117500  |
| C  | -4.82055800 | -1.66790100 | 0.54671700  |
| H  | -5.05093700 | -2.54229100 | -0.07542900 |
| H  | -5.37845900 | -1.77947000 | 1.48346300  |
| H  | -5.20389300 | -0.77968300 | 0.02866200  |
| C  | -2.77654300 | -2.76865900 | 1.58260900  |
| H  | -3.30595400 | -2.88380100 | 2.53570000  |

|   |             |             |             |
|---|-------------|-------------|-------------|
| H | -2.90944600 | -3.69793400 | 1.01610100  |
| H | -1.70923800 | -2.65387900 | 1.79687900  |
| H | -0.71322700 | 2.88952900  | 1.97176700  |
| H | -0.72485700 | 1.23606600  | 2.68102000  |
| H | 1.58956300  | 2.02495700  | -1.22222400 |
| H | 1.51328500  | 3.78261300  | -1.17710100 |
| H | 1.54571300  | 3.81185100  | 1.24788600  |
| H | 2.81365600  | 2.71509200  | 0.71964900  |

**<sup>1</sup>TS10**

|    |             |             |             |
|----|-------------|-------------|-------------|
| C  | 3.98062300  | 1.54570200  | -0.90170200 |
| C  | 1.89846200  | 1.59621800  | -0.13163000 |
| H  | 4.87368000  | 1.67788500  | -0.29128300 |
| H  | 4.16429100  | 1.92080800  | -1.90999700 |
| N  | 1.99614300  | 0.34132300  | -0.40502800 |
| O  | 2.93400700  | 2.39428600  | -0.31390600 |
| C  | 0.60016700  | 2.08242200  | 0.35556200  |
| C  | -1.57968300 | 1.98508900  | 0.80319500  |
| C  | -0.95829500 | 3.30223600  | 1.35441100  |
| H  | -2.02338200 | 1.39051400  | 1.60737200  |
| H  | -1.42862200 | 4.21113100  | 0.98068100  |
| H  | -0.89757200 | 3.33737500  | 2.44437700  |
| N  | -0.38591400 | 1.26020900  | 0.30281000  |
| O  | 0.42729100  | 3.29605300  | 0.85247700  |
| Ni | 0.24959400  | -0.61838200 | -0.20129500 |
| C  | -4.33930400 | -1.10997400 | -0.60917200 |
| C  | -3.52039400 | -1.05638400 | -1.74210400 |
| C  | -2.13290800 | -1.18075500 | -1.60780100 |
| C  | -1.58008600 | -1.33536400 | -0.33151500 |
| C  | -2.40146400 | -1.44355300 | 0.79805300  |
| C  | -3.78334800 | -1.30949200 | 0.66194200  |
| H  | -5.41686700 | -1.02782300 | -0.71726100 |
| H  | -3.96047900 | -0.92648400 | -2.72669000 |
| H  | -1.49723900 | -1.15681200 | -2.48974200 |
| H  | -4.42905700 | -1.40084600 | 1.53178500  |
| C  | -1.66460700 | -1.87265700 | 2.04579300  |
| C  | -0.74904600 | -3.04331700 | 1.60625000  |
| C  | 1.03428600  | -2.40248800 | -0.11235700 |
| H  | 1.51797200  | -2.67905500 | -1.05083900 |
| H  | 1.70944700  | -2.28888800 | 0.73574900  |
| C  | -0.27526100 | -2.89656200 | 0.14436200  |
| H  | 0.11827600  | -3.13140800 | 2.26860200  |
| H  | -1.31124500 | -3.98070500 | 1.67799300  |
| H  | -1.05078400 | -1.04347600 | 2.42533700  |

|   |             |             |             |
|---|-------------|-------------|-------------|
| H | -2.33690200 | -2.17656700 | 2.85350400  |
| C | 3.38921000  | 0.10237000  | -0.86727700 |
| H | 3.33850800  | -0.31605600 | -1.87770700 |
| C | 4.16071900  | -0.88600100 | 0.03721100  |
| H | 3.65384400  | -1.85122600 | -0.06360800 |
| C | 5.59612100  | -1.06963400 | -0.48087800 |
| H | 6.10363600  | -1.85429500 | 0.08871300  |
| H | 5.61034000  | -1.36089900 | -1.53773500 |
| H | 6.19314400  | -0.15622100 | -0.37262000 |
| C | 4.12991500  | -0.47924600 | 1.51587400  |
| H | 4.61709100  | 0.48910300  | 1.68488100  |
| H | 3.10310300  | -0.41108400 | 1.89282200  |
| H | 4.66306600  | -1.21795600 | 2.12254800  |
| C | -2.63614100 | 2.17706900  | -0.30550000 |
| H | -2.90642000 | 1.17130100  | -0.63138600 |
| C | -2.09336700 | 2.93746400  | -1.52194000 |
| H | -1.79978400 | 3.96539500  | -1.27542100 |
| H | -1.22660200 | 2.42866900  | -1.95861700 |
| H | -2.86380100 | 3.00029000  | -2.29698700 |
| C | -3.89576400 | 2.83584300  | 0.27409500  |
| H | -3.70678900 | 3.86052300  | 0.61800400  |
| H | -4.67717700 | 2.89092400  | -0.49048000 |
| H | -4.29442900 | 2.26131200  | 1.11849100  |
| C | -0.85410700 | -3.90035100 | -0.83555100 |
| H | -1.93854100 | -3.98973200 | -0.74415000 |
| H | -0.60208800 | -3.65125900 | -1.86917600 |
| H | -0.40362000 | -4.87498700 | -0.59988400 |

**<sup>1</sup>TS11**

|   |             |             |             |
|---|-------------|-------------|-------------|
| C | 1.46108200  | -3.71921900 | -0.06453900 |
| C | 1.91121500  | -2.28978100 | 0.34490500  |
| C | -0.23353500 | -2.29689000 | -0.25412500 |
| H | 2.05231100  | -4.16964700 | -0.86130600 |
| H | 1.38405200  | -4.41010400 | 0.77808800  |
| H | 2.32577100  | -2.28854300 | 1.35726000  |
| N | 0.62851100  | -1.54961200 | 0.34527400  |
| O | 0.09920900  | -3.53200000 | -0.59157300 |
| C | -1.52785600 | -1.69678400 | -0.60916400 |
| C | -3.04082800 | -0.08424700 | -0.81179700 |
| C | -3.65460200 | -1.46160200 | -1.20529800 |
| H | -3.08766000 | 0.60736400  | -1.65923200 |
| H | -4.51452900 | -1.75976800 | -0.60472600 |
| H | -3.90010300 | -1.54261900 | -2.26587700 |
| N | -1.62121400 | -0.41646600 | -0.55734000 |

|    |             |             |             |
|----|-------------|-------------|-------------|
| O  | -2.58342400 | -2.43144800 | -0.93466300 |
| Ni | 0.10647700  | 0.37262300  | 0.47981900  |
| C  | 1.20612600  | 3.59105100  | -2.39376700 |
| C  | -0.14326800 | 3.24368500  | -2.27689100 |
| C  | -0.57712800 | 2.51435500  | -1.16994600 |
| C  | 0.35424100  | 2.11333600  | -0.20432200 |
| C  | 1.69213000  | 2.55532000  | -0.23801300 |
| C  | 2.10468600  | 3.25961300  | -1.38058200 |
| H  | 1.55108100  | 4.14852500  | -3.25938600 |
| H  | -0.85412400 | 3.53265800  | -3.04569300 |
| H  | -1.61801300 | 2.23472300  | -1.07466300 |
| H  | 3.13999800  | 3.58496600  | -1.45122400 |
| C  | 2.62488600  | 2.47135800  | 0.95949100  |
| C  | 2.41106100  | 1.30776800  | 1.94344800  |
| C  | 0.96246300  | 0.92481400  | 2.16276900  |
| C  | 0.70637200  | -0.15052800 | 3.19662500  |
| C  | -0.06063100 | 1.88699600  | 1.87152500  |
| H  | 1.34920800  | -1.02075300 | 3.03442600  |
| H  | 0.92901600  | 0.24033800  | 4.19960700  |
| H  | -0.33552800 | -0.48549800 | 3.19419800  |
| H  | 2.94890100  | 0.41549600  | 1.60151900  |
| H  | 2.86760000  | 1.57198700  | 2.90976200  |
| H  | 3.66514000  | 2.47143600  | 0.61737500  |
| H  | 2.50210000  | 3.41589200  | 1.51118400  |
| C  | -3.66601300 | 0.60571000  | 0.42321600  |
| H  | -3.07504800 | 1.51917600  | 0.58036300  |
| C  | -3.55648800 | -0.24664700 | 1.69468100  |
| H  | -3.96307000 | 0.29899100  | 2.55225800  |
| H  | -4.12094700 | -1.18324300 | 1.61109100  |
| H  | -2.51354700 | -0.49861300 | 1.91935100  |
| C  | -5.11526400 | 1.01978000  | 0.13210300  |
| H  | -5.52602500 | 1.58770200  | 0.97272100  |
| H  | -5.18313700 | 1.64827200  | -0.76343000 |
| H  | -5.76284100 | 0.14712400  | -0.01693100 |
| C  | 2.91898100  | -1.60722400 | -0.61227300 |
| H  | 3.03891300  | -0.58438500 | -0.23247500 |
| C  | 4.28145800  | -2.31090100 | -0.54169400 |
| H  | 4.23059500  | -3.33447500 | -0.93255800 |
| H  | 5.01862400  | -1.77177100 | -1.14477600 |
| H  | 4.65906900  | -2.36045800 | 0.48649900  |
| C  | 2.39689700  | -1.50000600 | -2.05173400 |
| H  | 3.13572700  | -0.99222900 | -2.67946800 |
| H  | 2.21270200  | -2.48456600 | -2.49856400 |
| H  | 1.47033000  | -0.91740900 | -2.09985200 |

|   |             |            |            |
|---|-------------|------------|------------|
| H | 0.15866800  | 2.94840900 | 1.83158800 |
| H | -1.07985200 | 1.68794400 | 2.20458400 |

**<sup>2</sup>TS12**

|    |             |             |             |
|----|-------------|-------------|-------------|
| C  | 0.86004600  | 3.38680200  | -1.75096100 |
| C  | -0.62007700 | 2.18048700  | -0.63220200 |
| H  | 1.21360500  | 4.40535300  | -1.59030700 |
| H  | 0.85859400  | 3.14999800  | -2.81804100 |
| N  | 0.44593800  | 1.51349800  | -0.39019600 |
| O  | -0.53442100 | 3.33378700  | -1.29923400 |
| C  | -1.90520800 | 1.62708300  | -0.19801800 |
| C  | -3.30488700 | 0.11153900  | 0.63882400  |
| C  | -3.97572200 | 1.51875000  | 0.60181300  |
| H  | -3.17019100 | -0.22003800 | 1.67470700  |
| H  | -4.88099200 | 1.56281500  | -0.00577700 |
| H  | -4.17545800 | 1.92624000  | 1.59482700  |
| N  | -1.95897700 | 0.38879100  | 0.11225500  |
| O  | -2.98550500 | 2.39364000  | -0.03084400 |
| Ni | -0.03996800 | -0.48262900 | 0.13071300  |
| C  | 4.63813300  | -0.97717500 | -0.29607000 |
| C  | 4.05176000  | -0.32452200 | 0.78822100  |
| C  | 2.68933700  | -0.50276500 | 1.06518900  |
| C  | 1.93588400  | -1.31001900 | 0.21694200  |
| C  | 2.52935800  | -2.07716800 | -0.79323700 |
| C  | 3.88417100  | -1.86597400 | -1.06796500 |
| H  | 5.69429300  | -0.83730100 | -0.51093400 |
| H  | 4.64320400  | 0.32829200  | 1.42516300  |
| H  | 2.21576300  | 0.00293600  | 1.89902200  |
| H  | 4.35909500  | -2.44225200 | -1.85838000 |
| C  | 1.74229200  | -3.22062800 | -1.37285900 |
| C  | 1.12300000  | -3.94025400 | -0.16285400 |
| C  | -0.75130000 | -2.40759800 | 0.56232100  |
| H  | -1.38456400 | -2.09914500 | 1.38911500  |
| H  | -1.22476900 | -2.62440300 | -0.39135300 |
| C  | 0.50670300  | -2.97307100 | 0.84686000  |
| H  | 0.34689100  | -4.64557500 | -0.48694500 |
| H  | 1.90004100  | -4.51779200 | 0.35056500  |
| C  | 1.58004500  | 2.31031800  | -0.89509600 |
| H  | 2.20129000  | 1.65844800  | -1.51615900 |
| C  | 2.42495000  | 2.87690100  | 0.27083700  |
| H  | 2.79428000  | 2.00635600  | 0.81658500  |
| C  | 3.64330100  | 3.63376500  | -0.27629900 |
| H  | 4.29212400  | 3.95448200  | 0.54604700  |
| H  | 4.23723700  | 3.00123600  | -0.94754800 |

|    |             |             |             |
|----|-------------|-------------|-------------|
| H  | 3.35379400  | 4.53608000  | -0.83004700 |
| C  | 1.59979100  | 3.71891800  | 1.25334600  |
| H  | 1.12582500  | 4.58050600  | 0.76568100  |
| H  | 0.82350700  | 3.10949400  | 1.72762600  |
| H  | 2.24722300  | 4.10863000  | 2.04674600  |
| C  | -4.03560100 | -0.98701200 | -0.16224900 |
| H  | -3.41803100 | -1.88851200 | -0.06720100 |
| C  | -4.15261100 | -0.65891400 | -1.65612700 |
| H  | -4.74504200 | 0.24910900  | -1.82912800 |
| H  | -3.16447300 | -0.52591300 | -2.10718500 |
| H  | -4.65783900 | -1.47783800 | -2.18066100 |
| C  | -5.40042300 | -1.28383900 | 0.47698600  |
| H  | -6.07942900 | -0.42521400 | 0.39537200  |
| H  | -5.88384100 | -2.12680000 | -0.02828500 |
| H  | -5.30367600 | -1.53643400 | 1.54015400  |
| C  | 0.94467600  | -3.11473100 | 2.28190200  |
| H  | 2.03033400  | -3.21330200 | 2.35950800  |
| H  | 0.60898400  | -2.26706600 | 2.88353600  |
| H  | 0.49059000  | -4.03432000 | 2.68060200  |
| Br | -0.33901600 | -0.74147800 | -2.46010100 |
| Br | -0.25732200 | 0.25864200  | 2.67565000  |
| H  | 0.96567400  | -2.84018200 | -2.04233800 |
| H  | 2.38185700  | -3.90579000 | -1.93873200 |

**<sup>2</sup>TS13**

|    |             |             |             |
|----|-------------|-------------|-------------|
| C  | -1.41138600 | -2.60123000 | -0.88095900 |
| C  | 0.78466300  | -2.28596200 | -0.75064000 |
| H  | -0.91101300 | -4.68002300 | -1.53981700 |
| H  | -0.74313700 | -3.44512200 | -2.82360700 |
| H  | -2.12953800 | -2.02640300 | -1.47282700 |
| N  | -0.32009600 | -1.69937600 | -0.46956000 |
| O  | 0.75301500  | -3.45656100 | -1.39262900 |
| C  | 2.04881300  | -1.65974900 | -0.34427600 |
| C  | 3.36358300  | -0.11019900 | 0.55694300  |
| C  | 4.16504300  | -1.42420700 | 0.30192500  |
| H  | 3.23879900  | 0.06561500  | 1.63202500  |
| H  | 4.97573700  | -1.31197700 | -0.42089700 |
| H  | 4.54672700  | -1.88589200 | 1.21424900  |
| N  | 2.02735000  | -0.44617500 | 0.04671600  |
| O  | 3.19098600  | -2.35491700 | -0.27859400 |
| Ni | -0.01883400 | 0.30756700  | 0.16011400  |
| C  | -4.63741200 | 0.55618300  | -0.54521800 |
| C  | -4.07301700 | -0.14822200 | 0.51977700  |
| C  | -2.81450200 | 0.22052500  | 1.00238500  |



|    |             |             |             |
|----|-------------|-------------|-------------|
| C  | -2.10034300 | 1.25081600  | 0.37527800  |
| C  | -2.70426000 | 2.04846400  | -0.62762700 |
| C  | -3.96418500 | 1.65139200  | -1.09389300 |
| H  | -5.61908700 | 0.28259500  | -0.92309300 |
| H  | -4.61100100 | -0.97145700 | 0.98397400  |
| H  | -2.36347600 | -0.29458900 | 1.84391600  |
| H  | -4.43544400 | 2.22737000  | -1.88733300 |
| C  | -2.06097800 | 3.30242000  | -1.16001400 |
| C  | -1.61798000 | 4.29180800  | -0.02715300 |
| C  | -0.79726600 | 3.54387600  | 0.97620000  |
| C  | 0.67979400  | 3.41314000  | 0.74896500  |
| C  | -1.46189000 | 2.73561900  | 1.86993700  |
| H  | 0.87795200  | 3.05702100  | -0.27388500 |
| H  | 1.18159300  | 4.38499900  | 0.85087600  |
| H  | 1.13243400  | 2.70911200  | 1.45595900  |
| C  | 3.93534400  | 1.16714000  | -0.08978600 |
| H  | 3.20670400  | 1.95679500  | 0.13675400  |
| C  | 4.05777200  | 1.07072000  | -1.61526600 |
| H  | 4.41967200  | 2.02239000  | -2.02072900 |
| H  | 4.77455600  | 0.29736900  | -1.92103900 |
| H  | 3.08770400  | 0.85726900  | -2.07274600 |
| C  | 5.27003300  | 1.53667600  | 0.57360500  |
| H  | 5.64452800  | 2.48762700  | 0.17975100  |
| H  | 5.16817700  | 1.63684000  | 1.66112500  |
| H  | 6.03872000  | 0.77778700  | 0.37507600  |
| C  | -2.12725900 | -3.19292900 | 0.35700000  |
| H  | -2.52119400 | -2.33382300 | 0.90427500  |
| C  | -3.31710900 | -4.05739300 | -0.08232800 |
| H  | -2.99547500 | -4.95129000 | -0.63208800 |
| H  | -3.88044900 | -4.40159900 | 0.79177400  |
| H  | -4.00366000 | -3.49371100 | -0.72595100 |
| C  | -1.17457300 | -3.93878700 | 1.30097300  |
| H  | -1.73435600 | -4.34838900 | 2.14888000  |
| H  | -0.67052400 | -4.77851000 | 0.80550200  |
| H  | -0.41688000 | -3.25860200 | 1.70340900  |
| H  | -2.50231200 | 2.93689500  | 2.10627400  |
| H  | -0.92478300 | 2.09839000  | 2.56264200  |
| H  | -1.17935900 | 3.02701400  | -1.74427700 |
| H  | -2.75104500 | 3.82440200  | -1.83240500 |
| H  | -2.51089200 | 4.71724900  | 0.44546200  |
| H  | -1.05446000 | 5.11120100  | -0.48782000 |
| Br | 0.27376700  | 0.99868400  | -2.22228800 |
| Br | 0.30826000  | -0.19212300 | 2.59762600  |

**<sup>2</sup>TS14**

|    |             |             |             |
|----|-------------|-------------|-------------|
| C  | 3.84485400  | -1.36677400 | -1.40978500 |
| C  | 2.58412000  | 0.28483000  | -0.62222700 |
| H  | 4.77845800  | -1.75030200 | -0.99602300 |
| H  | 3.84432500  | -1.48294300 | -2.49627300 |
| N  | 1.82187100  | -0.71720000 | -0.39390500 |
| O  | 3.80194200  | 0.07156200  | -1.13049500 |
| C  | 2.08762000  | 1.63149700  | -0.31136200 |
| C  | 0.65710200  | 3.16034600  | 0.43099300  |
| C  | 2.05704700  | 3.79979300  | 0.18550100  |
| H  | 0.44903900  | 3.09316000  | 1.50660600  |
| H  | 2.06660900  | 4.53178300  | -0.62572600 |
| H  | 2.50356600  | 4.23556700  | 1.08035800  |
| N  | 0.85123800  | 1.77754700  | -0.02599400 |
| O  | 2.91148300  | 2.68294100  | -0.22732400 |
| Ni | -0.12765900 | -0.13520600 | 0.08773600  |
| C  | -1.68120200 | -3.26084200 | -1.34038100 |
| C  | -0.98553400 | -3.00521400 | -0.16336100 |
| C  | -1.38080800 | -1.99071600 | 0.72355900  |
| C  | -2.54702600 | -1.19676900 | 0.38768200  |
| C  | -3.28035000 | -1.52684600 | -0.82549200 |
| C  | -2.85915300 | -2.53499500 | -1.64757400 |
| H  | -1.34241000 | -4.04307000 | -2.01247100 |
| H  | -0.12371000 | -3.61234300 | 0.09626900  |
| H  | -0.95486900 | -1.93807500 | 1.71889400  |
| H  | -3.43767400 | -2.79421300 | -2.53007200 |
| C  | -4.54901500 | -0.71916800 | -0.89741200 |
| C  | -4.82664200 | -0.36605200 | 0.58527200  |
| C  | -2.45617400 | 0.55332500  | 0.63534500  |
| C  | -3.45210200 | -0.34180000 | 1.27207700  |
| H  | -5.35533900 | 0.58532500  | 0.70952600  |
| H  | -5.43318800 | -1.15180300 | 1.05248700  |
| H  | -4.38336300 | 0.18673500  | -1.49725000 |
| H  | -5.37256300 | -1.26456200 | -1.36841500 |
| C  | 2.56213300  | -1.93678800 | -0.73625500 |
| H  | 1.96034800  | -2.50224900 | -1.45575400 |
| C  | 2.79810200  | -2.80236700 | 0.52316800  |
| H  | 1.79949800  | -3.00908800 | 0.92848500  |
| C  | 3.45229700  | -4.13543800 | 0.13469000  |
| H  | 3.54302600  | -4.78760300 | 1.00982400  |
| H  | 2.86684900  | -4.66807100 | -0.62535700 |
| H  | 4.46373400  | -3.98628900 | -0.26523000 |
| C  | 3.58218800  | -2.06449500 | 1.61614100  |
| H  | 4.58087500  | -1.76321000 | 1.27411100  |

|    |             |             |             |
|----|-------------|-------------|-------------|
| H  | 3.03643800  | -1.17888200 | 1.95509100  |
| H  | 3.71980900  | -2.72018500 | 2.48293200  |
| C  | -0.53327700 | 3.85021000  | -0.26301300 |
| H  | -1.41491700 | 3.25571300  | 0.01339900  |
| C  | -0.42681300 | 3.84117600  | -1.79283500 |
| H  | 0.44452300  | 4.40893100  | -2.14468000 |
| H  | -0.35884500 | 2.81822000  | -2.17610100 |
| H  | -1.31461100 | 4.31156900  | -2.23112600 |
| C  | -0.71851400 | 5.26745100  | 0.29867500  |
| H  | 0.13072800  | 5.91364700  | 0.03982000  |
| H  | -1.61790500 | 5.73216400  | -0.11944500 |
| H  | -0.81689600 | 5.26126300  | 1.39123100  |
| C  | -3.41053900 | -0.49377600 | 2.77877300  |
| H  | -3.87957700 | -1.43699600 | 3.08211700  |
| H  | -2.38161600 | -0.47131200 | 3.15149800  |
| H  | -3.95892300 | 0.32978700  | 3.25187000  |
| H  | -2.67020600 | 1.09871700  | -0.27609300 |
| H  | -1.69502300 | 0.95653600  | 1.30003900  |
| Br | -0.63157400 | 0.00050900  | -2.37554100 |
| Br | 0.47069500  | 0.12205800  | 2.62547300  |

**<sup>2</sup>TS15**

|   |             |             |             |
|---|-------------|-------------|-------------|
| C | 2.69454100  | 0.13671800  | -0.41138800 |
| C | 2.27935000  | -1.18069400 | -0.14469900 |
| C | 1.00577700  | -1.45049100 | 0.32257200  |
| C | 0.07141000  | -0.37580500 | 0.53968100  |
| C | 0.51211600  | 0.97708100  | 0.23751800  |
| C | 1.78393200  | 1.20216900  | -0.23803700 |
| H | 3.69929700  | 0.33185400  | -0.77361200 |
| H | 2.97764700  | -2.00166100 | -0.29125900 |
| H | 0.70747900  | -2.46838400 | 0.56074900  |
| H | 2.07652600  | 2.21308100  | -0.51550500 |
| C | -0.63819000 | 1.94708400  | 0.20950700  |
| C | -1.78465300 | 1.14094100  | -0.47098000 |
| C | -1.21185200 | -0.57580900 | 1.31664600  |
| C | -1.60592600 | -0.31504600 | -0.08920400 |
| H | -2.77536100 | 1.52088800  | -0.18071200 |
| H | -1.70518200 | 1.24017800  | -1.56100300 |
| H | -0.94204500 | 2.24468800  | 1.22314600  |
| H | -0.40058200 | 2.86685300  | -0.33384400 |
| C | -2.11570500 | -1.40832200 | -0.97847100 |
| H | -1.88450100 | -1.20589000 | -2.03125300 |
| H | -1.67058000 | -2.37502800 | -0.71583800 |
| H | -3.20860800 | -1.51648200 | -0.89493500 |

|   |             |             |            |
|---|-------------|-------------|------------|
| H | -1.46358800 | 0.15952900  | 2.08391800 |
| H | -1.35530300 | -1.59657300 | 1.67127800 |

**<sup>2</sup>TS16**

|    |             |             |             |
|----|-------------|-------------|-------------|
| C  | 0.17662600  | 3.57469700  | -1.64926600 |
| C  | -1.28787200 | 2.18202900  | -0.71930900 |
| H  | 0.51266400  | 4.45486600  | -1.09647500 |
| H  | 0.23511500  | 3.76987600  | -2.72121100 |
| N  | -0.21372500 | 1.49586400  | -0.58956400 |
| O  | -1.23651200 | 3.37375800  | -1.31831800 |
| C  | -2.55315000 | 1.62503900  | -0.21989900 |
| C  | -3.90468900 | 0.11935400  | 0.69865400  |
| C  | -4.67141700 | 1.45389800  | 0.43890900  |
| H  | -3.81676600 | -0.07673700 | 1.77359700  |
| H  | -5.49714900 | 1.35853500  | -0.26918100 |
| H  | -5.02422400 | 1.93871200  | 1.35112700  |
| N  | -2.55527200 | 0.42282600  | 0.20800000  |
| O  | -3.67902900 | 2.34694300  | -0.17033400 |
| Ni | -0.56647800 | -0.39849100 | 0.25479400  |
| C  | 5.44425100  | 0.76352000  | 0.09680400  |
| C  | 4.90599500  | 0.73311100  | 1.38483200  |
| C  | 3.83343200  | -0.11451100 | 1.66896900  |
| C  | 3.29954900  | -0.93626500 | 0.66952100  |
| C  | 3.82752700  | -0.89307700 | -0.63726800 |
| C  | 4.90052000  | -0.04432900 | -0.90812800 |
| H  | 6.28168700  | 1.41802100  | -0.12984000 |
| H  | 5.31893400  | 1.36552700  | 2.16595000  |
| H  | 3.39775000  | -0.13790600 | 2.66431900  |
| H  | 5.31418400  | -0.01157100 | -1.91377700 |
| C  | 3.15072000  | -1.73460100 | -1.69531900 |
| C  | 2.68466200  | -3.09296900 | -1.14614600 |
| C  | 2.18710200  | -1.85932400 | 0.95676300  |
| C  | 1.95844500  | -2.96103000 | 0.16542700  |
| H  | 2.03641200  | -3.58643400 | -1.87805500 |
| H  | 3.54891600  | -3.76027000 | -0.98413100 |
| H  | 2.25434700  | -1.20616700 | -2.04989600 |
| H  | 3.80801500  | -1.87768800 | -2.56010000 |
| C  | 0.88405100  | 2.25717300  | -1.20866300 |
| H  | 1.21863900  | 1.68588900  | -2.08312000 |
| C  | 2.08009600  | 2.43145800  | -0.25337200 |
| H  | 2.47609800  | 1.42552800  | -0.09201000 |
| C  | 3.17627600  | 3.26795900  | -0.92722100 |
| H  | 4.06565100  | 3.29934900  | -0.29152400 |
| H  | 3.47451200  | 2.83741600  | -1.89091900 |

|    |             |             |             |
|----|-------------|-------------|-------------|
| H  | 2.85357600  | 4.30352100  | -1.09949800 |
| C  | 1.67483100  | 2.99258700  | 1.11423300  |
| H  | 1.23004200  | 3.99411700  | 1.03700900  |
| H  | 0.96226200  | 2.32959300  | 1.61551400  |
| H  | 2.56055800  | 3.07617800  | 1.75314000  |
| C  | -4.48054500 | -1.13875700 | 0.01423700  |
| H  | -3.78685300 | -1.95051700 | 0.27131000  |
| C  | -4.51038800 | -1.02395500 | -1.51493900 |
| H  | -5.14966500 | -0.19752700 | -1.85315900 |
| H  | -3.50207900 | -0.88170100 | -1.91446000 |
| H  | -4.91446800 | -1.94447700 | -1.95043800 |
| C  | -5.86013900 | -1.47390900 | 0.59845900  |
| H  | -6.59886200 | -0.69809500 | 0.35666100  |
| H  | -6.23301900 | -2.41640700 | 0.18361900  |
| H  | -5.82345000 | -1.57645300 | 1.68991700  |
| C  | 0.94188200  | -3.99185000 | 0.52556700  |
| H  | 1.34386000  | -5.00435700 | 0.38573300  |
| H  | 0.58793800  | -3.88245800 | 1.55472700  |
| H  | 0.08321300  | -3.88514900 | -0.15242200 |
| H  | 0.86913100  | -1.05592500 | 0.38735200  |
| H  | 1.76246000  | -1.82685800 | 1.95652200  |
| Br | -0.65317200 | -1.62344500 | -1.82748300 |
| Br | -0.44475200 | -0.15188600 | 2.64212800  |

**<sup>2</sup>TS17**

|    |             |             |             |
|----|-------------|-------------|-------------|
| C  | -2.40950600 | 2.53472400  | 1.33593900  |
| C  | -0.50693000 | 1.83291000  | 0.42209000  |
| H  | -3.20221800 | 3.09101300  | 0.83419600  |
| H  | -2.37882100 | 2.80755300  | 2.39349600  |
| N  | -1.09894400 | 0.71288200  | 0.61263600  |
| O  | -1.13565500 | 2.96499300  | 0.74335100  |
| C  | 0.83442100  | 1.81595800  | -0.18328700 |
| C  | 2.67174600  | 0.93723800  | -1.07323900 |
| C  | 2.80285200  | 2.48877100  | -0.97319800 |
| H  | 2.69995500  | 0.61318900  | -2.11943100 |
| H  | 3.62629800  | 2.82675800  | -0.34128100 |
| H  | 2.85947700  | 2.98367300  | -1.94490100 |
| N  | 1.31445500  | 0.69134600  | -0.56284400 |
| O  | 1.55807400  | 2.92922300  | -0.33381700 |
| Ni | -0.04989000 | -0.91303400 | -0.12009300 |
| C  | -2.45807200 | 0.99558400  | 1.09766600  |
| H  | -2.60183100 | 0.45895400  | 2.04127400  |
| C  | -3.50873100 | 0.49814700  | 0.07778700  |
| H  | -3.30901700 | -0.57399600 | -0.04646700 |

|    |             |             |             |
|----|-------------|-------------|-------------|
| C  | -4.92277700 | 0.67897700  | 0.64647400  |
| H  | -5.66401300 | 0.24978800  | -0.03555500 |
| H  | -5.03486100 | 0.18499700  | 1.61937700  |
| H  | -5.17529800 | 1.74009700  | 0.77509300  |
| C  | -3.35216700 | 1.15128700  | -1.30113600 |
| H  | -3.48190400 | 2.24109700  | -1.26059900 |
| H  | -2.37574400 | 0.91845900  | -1.73482700 |
| H  | -4.11035000 | 0.75710400  | -1.98554700 |
| C  | 3.71153800  | 0.11431600  | -0.28000600 |
| H  | 3.42368500  | -0.93527200 | -0.42824500 |
| C  | 3.66895700  | 0.39992000  | 1.22666900  |
| H  | 3.90460800  | 1.44815400  | 1.45311900  |
| H  | 2.68663200  | 0.16187700  | 1.64540700  |
| H  | 4.40889700  | -0.21847700 | 1.74579500  |
| C  | 5.11469400  | 0.32005000  | -0.86762300 |
| H  | 5.46118700  | 1.35320800  | -0.73304600 |
| H  | 5.83780100  | -0.33209100 | -0.36679200 |
| H  | 5.14133200  | 0.09154200  | -1.93988000 |
| H  | -0.64743300 | -2.07043900 | 0.73358700  |
| Br | 0.56701500  | -2.00362000 | 2.04238200  |
| Br | -1.00803000 | -1.76274700 | -2.08054700 |

**<sup>2</sup>TS18**

|    |             |             |             |
|----|-------------|-------------|-------------|
| C  | -0.35936100 | 3.89889300  | -1.30853800 |
| C  | -1.69471700 | 2.36965300  | -0.39021900 |
| H  | -0.07468900 | 4.80221800  | -0.76328500 |
| H  | -0.34228400 | 4.10156300  | -2.38124200 |
| N  | -0.56302900 | 1.76839800  | -0.29602100 |
| O  | -1.74428600 | 3.58945000  | -0.94555600 |
| C  | -2.88400700 | 1.64709000  | 0.05847500  |
| C  | -4.02821700 | -0.11422100 | 0.79871700  |
| C  | -4.99929600 | 1.04455000  | 0.40981600  |
| H  | -4.08315400 | -0.32603000 | 1.87260900  |
| H  | -5.67053900 | 0.79728900  | -0.41607100 |
| H  | -5.58236400 | 1.42609200  | 1.25080500  |
| N  | -2.70742100 | 0.46171600  | 0.51960600  |
| O  | -4.13066200 | 2.13310800  | -0.04957900 |
| Ni | -0.75992100 | -0.24578900 | 0.25833800  |
| C  | 4.30366400  | 1.40495900  | 2.02427400  |
| C  | 3.20621900  | 0.80827500  | 2.64893600  |
| C  | 2.54552800  | -0.25891700 | 2.03615000  |
| C  | 2.99217400  | -0.73392100 | 0.79791200  |
| C  | 4.08325900  | -0.12299400 | 0.15463000  |
| C  | 4.73651000  | 0.94105900  | 0.77781300  |

|    |             |             |             |
|----|-------------|-------------|-------------|
| H  | 4.82162600  | 2.23223800  | 2.50228900  |
| H  | 2.85996100  | 1.17383900  | 3.61147400  |
| H  | 1.67978700  | -0.72461700 | 2.49912900  |
| H  | 5.58563700  | 1.41106800  | 0.28651900  |
| C  | 4.47157400  | -0.64294000 | -1.21250700 |
| C  | 4.36363700  | -2.17886400 | -1.28195900 |
| C  | 2.31668900  | -1.88414700 | 0.12953100  |
| C  | 3.04543800  | -2.67536500 | -0.77835200 |
| H  | 4.55378100  | -2.54546100 | -2.29765400 |
| H  | 5.13877800  | -2.63366600 | -0.63870600 |
| H  | 3.79196100  | -0.21927500 | -1.96642600 |
| H  | 5.48568000  | -0.32851100 | -1.48080800 |
| C  | 0.45690300  | 2.63564300  | -0.89930400 |
| H  | 0.83311300  | 2.10863400  | -1.78397200 |
| C  | 1.63596700  | 2.86512900  | 0.06480200  |
| H  | 2.04348900  | 1.86807700  | 0.26243400  |
| C  | 2.73079300  | 3.70207700  | -0.60790400 |
| H  | 3.60701500  | 3.77432300  | 0.04450400  |
| H  | 3.05398100  | 3.25025800  | -1.55388300 |
| H  | 2.38877000  | 4.72405800  | -0.82003300 |
| C  | 1.19919400  | 3.46099000  | 1.40774200  |
| H  | 0.78081500  | 4.46996400  | 1.29677300  |
| H  | 0.44718100  | 2.82706800  | 1.88893100  |
| H  | 2.05880100  | 3.53224300  | 2.08151300  |
| C  | -4.20781100 | -1.44770700 | 0.03995200  |
| H  | -3.42651400 | -2.10355600 | 0.44398700  |
| C  | -3.96499200 | -1.30596600 | -1.46799300 |
| H  | -4.66717600 | -0.60281700 | -1.93690100 |
| H  | -2.94333600 | -0.96865700 | -1.67105000 |
| H  | -4.09721000 | -2.27535100 | -1.96103000 |
| C  | -5.57948200 | -2.06000300 | 0.35230000  |
| H  | -6.39974000 | -1.44559100 | -0.04354000 |
| H  | -5.66786000 | -3.05171200 | -0.10428900 |
| H  | -5.73290000 | -2.17369800 | 1.43255600  |
| C  | 2.41134000  | -3.87410900 | -1.38294100 |
| H  | 3.14269400  | -4.55174300 | -1.83438800 |
| H  | 1.77725700  | -4.41000600 | -0.67008500 |
| H  | 1.74125800  | -3.50969400 | -2.18272100 |
| H  | 1.54008800  | -1.43796800 | -0.72221900 |
| H  | 1.53720700  | -2.38565400 | 0.72045100  |
| Br | 0.18757200  | -0.88761300 | -2.05104200 |
| Br | -0.75033300 | -2.14636000 | 1.76443800  |

**Ni<sup>0</sup>L**

|    |             |             |             |
|----|-------------|-------------|-------------|
| C  | -2.62092300 | 1.49344600  | 1.08709600  |
| H  | -3.45632400 | 2.02867300  | 0.62968100  |
| H  | -2.57280200 | 1.74586000  | 2.15335000  |
| O  | -1.40552500 | 1.95040300  | 0.45168800  |
| C  | -0.63981800 | 0.83349200  | 0.28867000  |
| N  | -1.22757500 | -0.32622900 | 0.62876700  |
| C  | -2.64263200 | -0.04170200 | 0.86523100  |
| H  | -2.97749000 | -0.54676900 | 1.78033000  |
| C  | -3.53863400 | -0.53117000 | -0.30024800 |
| C  | -5.02695400 | -0.33750700 | 0.02256100  |
| H  | -5.28805200 | 0.72662700  | 0.08580200  |
| H  | -5.65569200 | -0.77975800 | -0.75853100 |
| H  | -5.29661900 | -0.80553200 | 0.97765200  |
| C  | -3.16030200 | 0.10532700  | -1.64407100 |
| H  | -3.77836100 | -0.30499200 | -2.45105700 |
| H  | -3.30913500 | 1.19190300  | -1.63153200 |
| H  | -2.11027200 | -0.08958000 | -1.88436500 |
| H  | -3.34425300 | -1.61219300 | -0.37696600 |
| Ni | -0.00000600 | -1.71473900 | 0.00015300  |
| N  | 1.22752900  | -0.32629000 | -0.62865600 |
| C  | 0.63973400  | 0.83346600  | -0.28874800 |
| O  | 1.40540500  | 1.95037600  | -0.45194400 |
| C  | 2.62082000  | 1.49335600  | -1.08727400 |
| H  | 3.45619800  | 2.02868300  | -0.62993400 |
| H  | 2.57269900  | 1.74560500  | -2.15356700 |
| C  | 2.64257700  | -0.04175900 | -0.86517400 |
| H  | 2.97742900  | -0.54696400 | -1.78019900 |
| C  | 3.53861900  | -0.53102700 | 0.30036100  |
| C  | 5.02694700  | -0.33791100 | -0.02274400 |
| H  | 5.65567400  | -0.78008000 | 0.75840200  |
| H  | 5.29632700  | -0.80634500 | -0.97771600 |
| H  | 5.28835100  | 0.72612200  | -0.08639000 |
| C  | 3.16067300  | 0.10610000  | 1.64399300  |
| H  | 3.77877500  | -0.30404100 | 2.45103600  |
| H  | 2.11063900  | -0.08845800 | 1.88454800  |
| H  | 3.30976300  | 1.19263600  | 1.63098400  |
| H  | 3.34396000  | -1.61196900 | 0.37752200  |

**Ni<sup>I</sup>LBr**

|   |            |             |            |
|---|------------|-------------|------------|
| C | 3.22396400 | -1.88975600 | 0.78580300 |
| H | 4.00251300 | -2.15131400 | 0.06620900 |
| H | 3.49632100 | -2.27258700 | 1.77172300 |
| O | 2.00097500 | -2.58171000 | 0.37084100 |
| C | 1.08448400 | -1.61718300 | 0.23069900 |



|    |             |             |             |
|----|-------------|-------------|-------------|
| N  | 1.41554000  | -0.39313500 | 0.46179600  |
| C  | 2.84969700  | -0.37580900 | 0.79207400  |
| H  | 2.96373900  | 0.04493400  | 1.79746100  |
| C  | 3.62070700  | 0.52418000  | -0.19917100 |
| C  | 5.10702100  | 0.59104400  | 0.17658100  |
| H  | 5.59849800  | -0.38323900 | 0.05507000  |
| H  | 5.63303100  | 1.30255700  | -0.46851000 |
| H  | 5.24654300  | 0.91266600  | 1.21574500  |
| C  | 3.41147400  | 0.10449600  | -1.65980200 |
| H  | 3.94189500  | 0.79032300  | -2.32872300 |
| H  | 3.79386800  | -0.90565200 | -1.85675900 |
| H  | 2.34939300  | 0.13121400  | -1.92500600 |
| H  | 3.18411600  | 1.52471800  | -0.07562300 |
| Ni | -0.03972200 | 0.94324000  | 0.02234500  |
| N  | -0.97061700 | -0.81170500 | -0.53422900 |
| C  | -0.28541400 | -1.85330400 | -0.22267000 |
| O  | -0.86369600 | -3.05935300 | -0.26607600 |
| C  | -2.24479700 | -2.80028500 | -0.69258100 |
| H  | -2.90127700 | -3.22353800 | 0.07048300  |
| H  | -2.39621600 | -3.32675200 | -1.63737100 |
| C  | -2.34354400 | -1.24806700 | -0.82334900 |
| H  | -2.58382300 | -0.96205300 | -1.85357800 |
| C  | -3.33947200 | -0.53464900 | 0.11921100  |
| C  | -4.78114400 | -0.93101100 | -0.22423600 |
| H  | -5.48947100 | -0.35654300 | 0.38187500  |
| H  | -5.01133700 | -0.74049900 | -1.27956400 |
| H  | -4.96818600 | -1.99467900 | -0.02370100 |
| C  | -3.01417800 | -0.76357400 | 1.60051300  |
| H  | -3.72219500 | -0.21329800 | 2.22885100  |
| H  | -2.00893000 | -0.39968300 | 1.83781700  |
| H  | -3.07989200 | -1.82334300 | 1.88140600  |
| H  | -3.20415900 | 0.53597800  | -0.08379000 |
| Br | -1.01936200 | 3.01217000  | -0.00083500 |

**Ni<sup>II</sup>LBr<sub>2</sub>**

|   |             |            |             |
|---|-------------|------------|-------------|
| C | 2.75190800  | 2.53728000 | -0.84199300 |
| C | 0.70425200  | 1.98134900 | -0.20020500 |
| H | 3.52705600  | 3.04412300 | -0.26750900 |
| H | 2.83469200  | 2.80509700 | -1.89833100 |
| N | 1.22776000  | 0.81818700 | -0.36527800 |
| O | 1.45549200  | 3.06264700 | -0.37055800 |
| C | -0.70410000 | 1.98147900 | 0.19964200  |
| C | -2.67221000 | 1.00389900 | 0.59883900  |
| C | -2.75168200 | 2.53813200 | 0.84102600  |

|    |             |             |             |
|----|-------------|-------------|-------------|
| H  | -2.94682100 | 0.43268000  | 1.48847500  |
| H  | -3.52660200 | 3.04450300  | 0.26580700  |
| H  | -2.83489600 | 2.80683900  | 1.89709000  |
| N  | -1.22770600 | 0.81844900  | 0.36529700  |
| O  | -1.45510000 | 3.06296500  | 0.36966800  |
| Ni | -0.00013700 | -0.68823100 | -0.00033800 |
| C  | 2.67231200  | 1.00335300  | -0.59861300 |
| H  | 2.94725200  | 0.43132500  | -1.48761800 |
| C  | 3.49422200  | 0.47748600  | 0.60198400  |
| H  | 3.25026500  | -0.58822300 | 0.66098300  |
| C  | 4.99498800  | 0.61644700  | 0.31282300  |
| H  | 5.57827000  | 0.15661800  | 1.11738400  |
| H  | 5.26845400  | 0.11891100  | -0.62498400 |
| H  | 5.30761300  | 1.66720100  | 0.24542300  |
| C  | 3.09922900  | 1.13663400  | 1.92941900  |
| H  | 3.27425000  | 2.22078900  | 1.92574800  |
| H  | 2.04399100  | 0.95755600  | 2.16341100  |
| H  | 3.69166900  | 0.71420700  | 2.74756700  |
| C  | -3.49463100 | 0.47718600  | -0.60101300 |
| H  | -3.25086500 | -0.58860900 | -0.65928700 |
| C  | -3.09987000 | 1.13513000  | -1.92913900 |
| H  | -3.27444600 | 2.21936800  | -1.92632600 |
| H  | -2.04478400 | 0.95542000  | -2.16329400 |
| H  | -3.69275300 | 0.71230500  | -2.74675900 |
| C  | -4.99529900 | 0.61649400  | -0.31155500 |
| H  | -5.30792800 | 1.66730500  | -0.24512000 |
| H  | -5.57880500 | 0.15585800  | -1.11549200 |
| H  | -5.26849700 | 0.11988900  | 0.62682600  |
| Br | 1.51845200  | -2.24676500 | -0.80166700 |
| Br | -1.51820800 | -2.24675700 | 0.80181500  |

**Ni<sup>III</sup>LBr<sub>2</sub>**

|   |             |             |             |
|---|-------------|-------------|-------------|
| C | 2.75190800  | -2.53728000 | 0.84199300  |
| C | 0.70425200  | -1.98134900 | 0.20020500  |
| H | 3.52705600  | -3.04412300 | 0.26750900  |
| H | 2.83469200  | -2.80509700 | 1.89833100  |
| N | 1.22776000  | -0.81818700 | 0.36527800  |
| O | 1.45549200  | -3.06264700 | 0.37055800  |
| C | -0.70410000 | -1.98147900 | -0.19964200 |
| C | -2.67221000 | -1.00389900 | -0.59883900 |
| C | -2.75168200 | -2.53813200 | -0.84102600 |
| H | -2.94682100 | -0.43268000 | -1.48847500 |
| H | -3.52660200 | -3.04450300 | -0.26580700 |
| H | -2.83489600 | -2.80683900 | -1.89709000 |

|    |             |             |             |
|----|-------------|-------------|-------------|
| N  | -1.22770600 | -0.81844900 | -0.36529700 |
| O  | -1.45510000 | -3.06296500 | -0.36966800 |
| Ni | -0.00013700 | 0.68823100  | 0.00033800  |
| C  | 2.67231200  | -1.00335300 | 0.59861300  |
| H  | 2.94725200  | -0.43132500 | 1.48761800  |
| C  | 3.49422200  | -0.47748600 | -0.60198400 |
| H  | 3.25026500  | 0.58822300  | -0.66098300 |
| C  | 4.99498800  | -0.61644700 | -0.31282300 |
| H  | 5.57827000  | -0.15661800 | -1.11738400 |
| H  | 5.26845400  | -0.11891100 | 0.62498400  |
| H  | 5.30761300  | -1.66720100 | -0.24542300 |
| C  | 3.09922900  | -1.13663400 | -1.92941900 |
| H  | 3.27425000  | -2.22078900 | -1.92574800 |
| H  | 2.04399100  | -0.95755600 | -2.16341100 |
| H  | 3.69166900  | -0.71420700 | -2.74756700 |
| C  | -3.49463100 | -0.47718600 | 0.60101300  |
| H  | -3.25086500 | 0.58860900  | 0.65928700  |
| C  | -3.09987000 | -1.13513000 | 1.92913900  |
| H  | -3.27444600 | -2.21936800 | 1.92632600  |
| H  | -2.04478400 | -0.95542000 | 2.16329400  |
| H  | -3.69275300 | -0.71230500 | 2.74675900  |
| C  | -4.99529900 | -0.61649400 | 0.31155500  |
| H  | -5.30792800 | -1.66730500 | 0.24512000  |
| H  | -5.57880500 | -0.15585800 | 1.11549200  |
| H  | -5.26849700 | -0.11988900 | -0.62682600 |
| Br | 1.51845200  | 2.24676500  | 0.80166700  |
| Br | -1.51820800 | 2.24675700  | -0.80181500 |
